# Supplementary material for: β-Phenyl quenching of 9-phenylphenalenones: a novel photocyclisation reaction with biological implications
Source: Royal Society of Chemistry journal article supplement (doi:10.1039/c4cp02783c), 2014-01-01
Supplement: c4cp02783c1.pdf [file c4cp02783c1.pdf]

## Electronic Supplementary Information

# **$\beta$ -Phenyl Quenching of 9-Phenylphenalenone. A novel Photocyclisation Reaction with Biological Implications**

*Götz Bucher,<sup>a\*</sup> Roger Bresolí-Obach,<sup>b</sup> Carme Brosa,<sup>b</sup> Cristina Flors,<sup>b,c</sup> Javier G. Luis,<sup>d,e</sup>*

*Teresa A. Grillo,<sup>d,e</sup> and Santi Nonell<sup>b\*</sup>*

<sup>a</sup>WestCHEM, School of Chemistry, University of Glasgow, Joseph-Black-Building, University Avenue, Glasgow G12 8QQ, United Kingdom. e-Mail: [goebu@chem.gla.ac.uk](mailto:goebu@chem.gla.ac.uk)

<sup>b</sup>Institut Químic de Sarrià, Universitat Ramon Llull, E-08017, Barcelona, Spain. e-Mail: [santi.nonell@iqs.url.edu](mailto:santi.nonell@iqs.url.edu)

<sup>c</sup>IMDEA Nanociencia, E-28049 Madrid, Spain

<sup>d</sup>Instituto Universitario de Bio-Orgánica "Antonio González", Avda. Astrofísico Fco. Sánchez 2, Universidad de La Laguna, E-38206, La Laguna, Tenerife, Canary Islands, Spain

<sup>e</sup>Departamento de Química Orgánica, Facultad de Farmacia, Avda. Astrofísico Fco. Sánchez s/n, Universidad de La Laguna, E-38206, La Laguna, Tenerife, Canary Islands, Spain.

## Naturally occurring 9-phenylphenalenones.

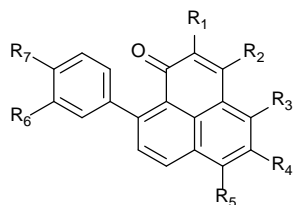

| R <sub>1</sub>  | R <sub>2</sub> | R <sub>3</sub> | R <sub>4</sub> | R <sub>5</sub> | R <sub>6</sub> | R <sub>7</sub> | Ref. |
|-----------------|----------------|----------------|----------------|----------------|----------------|----------------|------|
| H               | H              | H              | H              | H              | H              | H              | 1    |
| OH              | H              | H              | H              | H              | H              | H              | 2    |
| OMe             | H              | H              | H              | H              | H              | H              | 3    |
| OH              | H              | H              | H              | H              | H              | OH             | 2    |
| OH              | H              | H              | H              | H              | H              | OMe            | 1    |
| OMe             | H              | H              | H              | H              | H              | OH             | 4    |
| OMe             | H              | H              | H              | H              | H              | OMe            | 4    |
| OH              | H              | H              | H              | H              | OH             | OH             | 5    |
| OH              | H              | H              | H              | H              | OMe            | OH             | 1    |
| OMe             | H              | H              | H              | H              | OMe            | OMe            | 4    |
| OH              | OH             | H              | H              | H              | H              | OH             | 1    |
| OH              | H              | OH             | H              | H              | H              | H              | 6    |
| OH              | H              | OH             | H              | H              | H              | OH             | 7    |
| OH              | H              | OH             | H              | H              | OH             | OH             | 7    |
| OMe             | H              | OH             | H              | H              | H              | H              | 1    |
| OMe             | H              | Glu            | H              | H              | H              | H              | 7    |
| OH              | H              | OH             | OMe            | H              | H              | H              | 5    |
| OH              | H              | H              | OH             | OH             | H              | H              | 8    |
| OMe             | H              | H              | OH             | OH             | H              | H              | 8    |
| OH              | H              | H              | OMe            | OH             | H              | H              | 7    |
| OH              | H              | H              | OH             | GluGlu         | H              | H              | 9    |
| OMe             | H              | H              | OMe            | OH             | H              | H              | 10   |
| O-<br>GlucGluc  | H              | H              | OMe            | OH             | H              | H              | 11   |
| O-<br>Celobiose | H              | H              | OMe            | OH             | H              | H              | 9    |
| OH              | H              | H              | H              | OH             | H              | H              | 8    |

**Scheme S1:** Naturally-occurring 9-phenylphenalenones. Glu = O-Glucoside.

## Synthesis

**General Information.** Materials obtained from commercial suppliers were used without further purification. Reactions were monitored by analytical thin-layer chromatography (TLC) (Macherey-Nagel (MN) Silicagel Polygram UV<sub>254</sub> of 0,20 mm) using ultraviolet light (254nm) for visualization. Purification of products was conducted by flash column chromatography on silica gel (200–300 mesh). <sup>1</sup>H-NMR spectra were recorded on a Varian 400 spectrometer (400 MHz) using residual solvent ( $\delta$  (CDCl<sub>3</sub>) = 7.26) as internal standard. All of the coupling constants are reported in hertz. <sup>13</sup>C-NMR spectra were recorded on the same instrument, and chemical shifts were measured relative to solvent resonances ( $\delta$  (CDCl<sub>3</sub>) = 77.0). The UV-Vis spectra were recorded using a Cary 6000i spectrophotometer.

### 9-(Perdeuterophenyl)-1*H*-phenalen-1-one (1d).

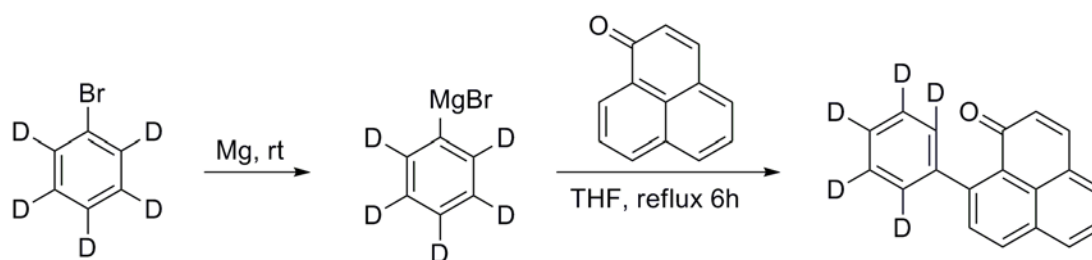

A solution of perdeutero-bromobenzene (354 mg, 2.19 mmol, 0.7M) in diethyl ether (3 mL) was added dropwise to a suspension of magnesium turnings (78 mg, 3.2 mmol) in diethyl ether (2 mL). The reaction mixture was stirred and heated at reflux for 20 min and then cooled to room temperature. The Grignard's reagent was added to a stirred solution of phenalen-1*H*-one (284 mg, 1.58 mmol) in THF (12 mL). The reaction mixture was stirred and heated

at reflux for 6 h. The reaction mixture was cooled to room temperature, and then quenched with an aqueous saturated solution of  $\text{NH}_4\text{Cl}$  (10 mL) and extracted with EtOAc (3 x 15 mL). The combined organic extracts were washed with  $\text{H}_2\text{O}$ , brine (15 mL) and dried ( $\text{Na}_2\text{SO}_4$ ). Removal of solvent under vacuo followed by silica gel column flash chromatography (EtOAc: hexanes, 1:3) afforded compound **1d** (96 mg, 24%) as a yellow solid.

$^1\text{H-NMR}$ :  $\delta$  8.17 (1H, d,  $J = 8.0$  Hz, H-7), 8.04 (1H, dd,  $J = 1.0, 8.0$  Hz, H-6), 7.78 (1H, dd,  $J = 1.0, 7.0$  Hz, H-4), 7.69 (1H, d,  $J = 9.5$  Hz, H-3), 7.62 (1H, dd,  $J = 7.0, 8.0$  Hz, H-5), 7.60 (1H, d,  $J = 8.0$  Hz, H-8), 6.59 (1H, d,  $J = 9.5$  Hz, H-2).  $^{13}\text{C-NMR}$ :  $\delta$  185.93 (C-1), 147.78 (C-9), 140.54 (C-3), 133.87 (C-7), 131.90 (C-9a), 131.88 (C-6), 131.77 (C-8), 131.55 (C-4), 130.68 (C-2), 128.67 (C-3a), 128.53 (C-9b), 126.52 (C-6a), 126.20 (C-5). GC-MS (EI, 70 eV): M/Z (%; fragment) 261 (24;  $\text{M}^+$ ), 260 (27;  $\text{M}^+ - \text{H}$ ), 260 (100;  $\text{M}^+ - \text{D}$ ), 230 (11;  $\text{M}^+ - \text{H} - \text{COH}$ ).

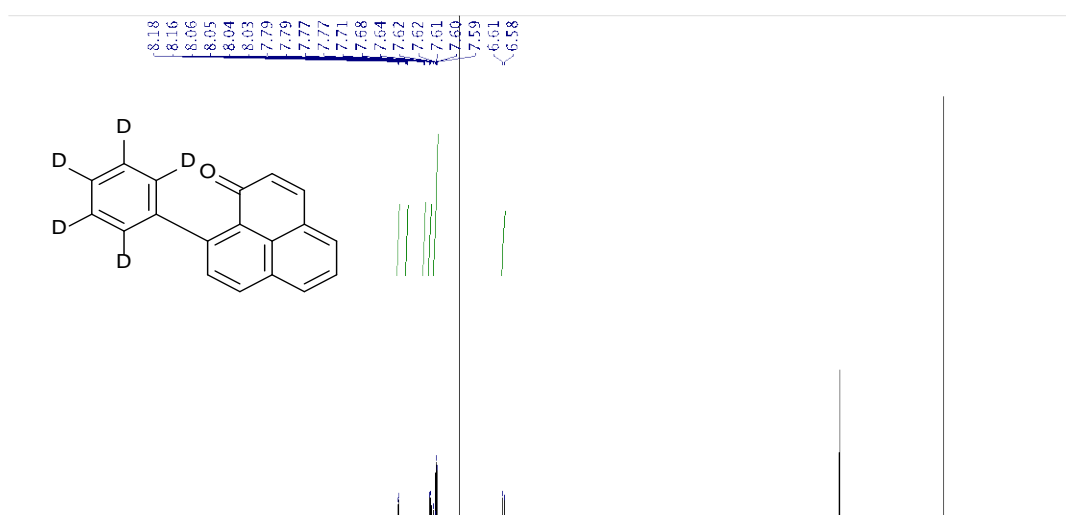

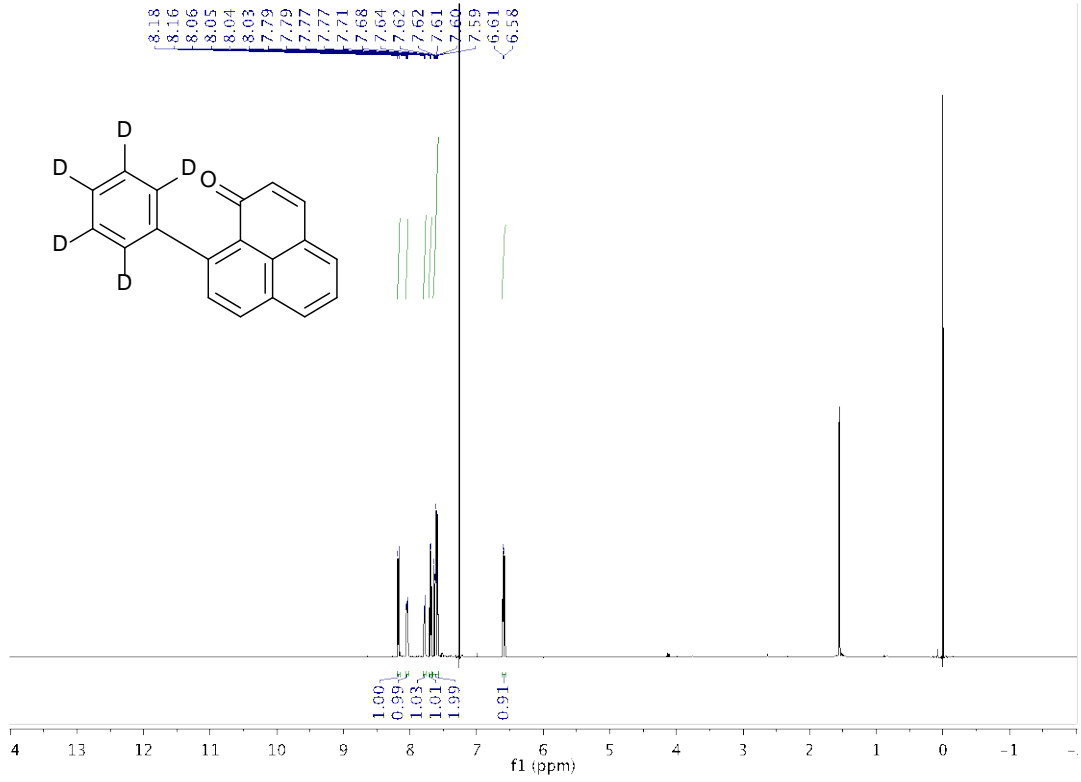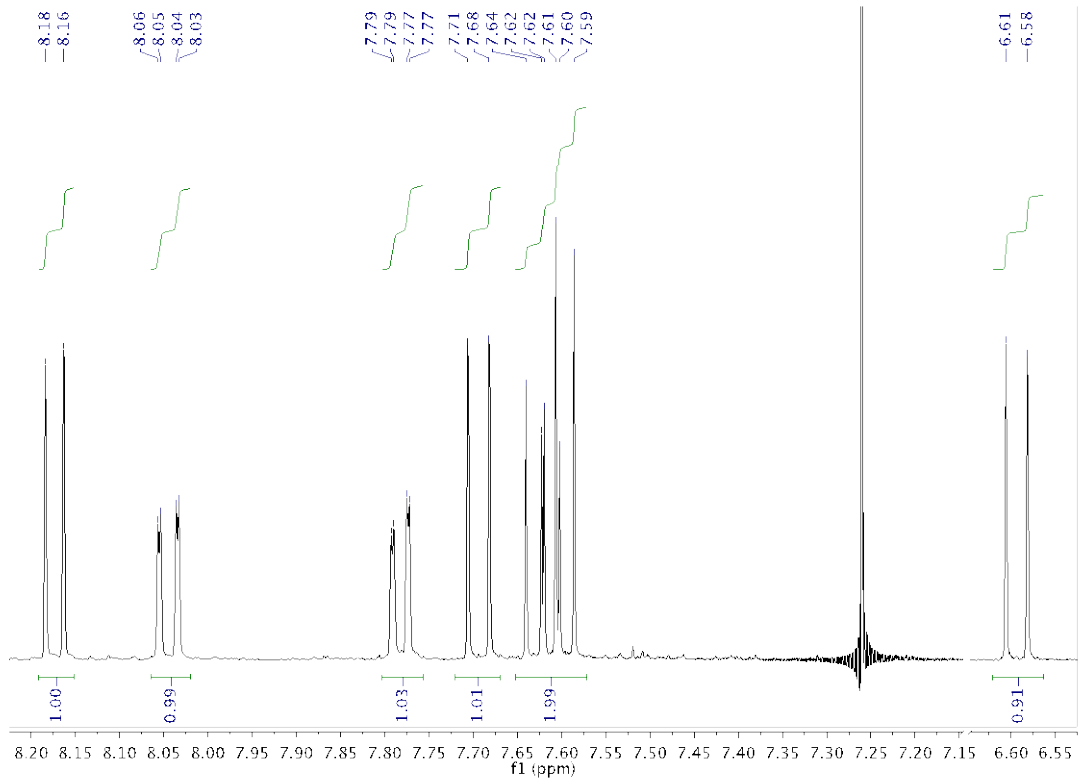

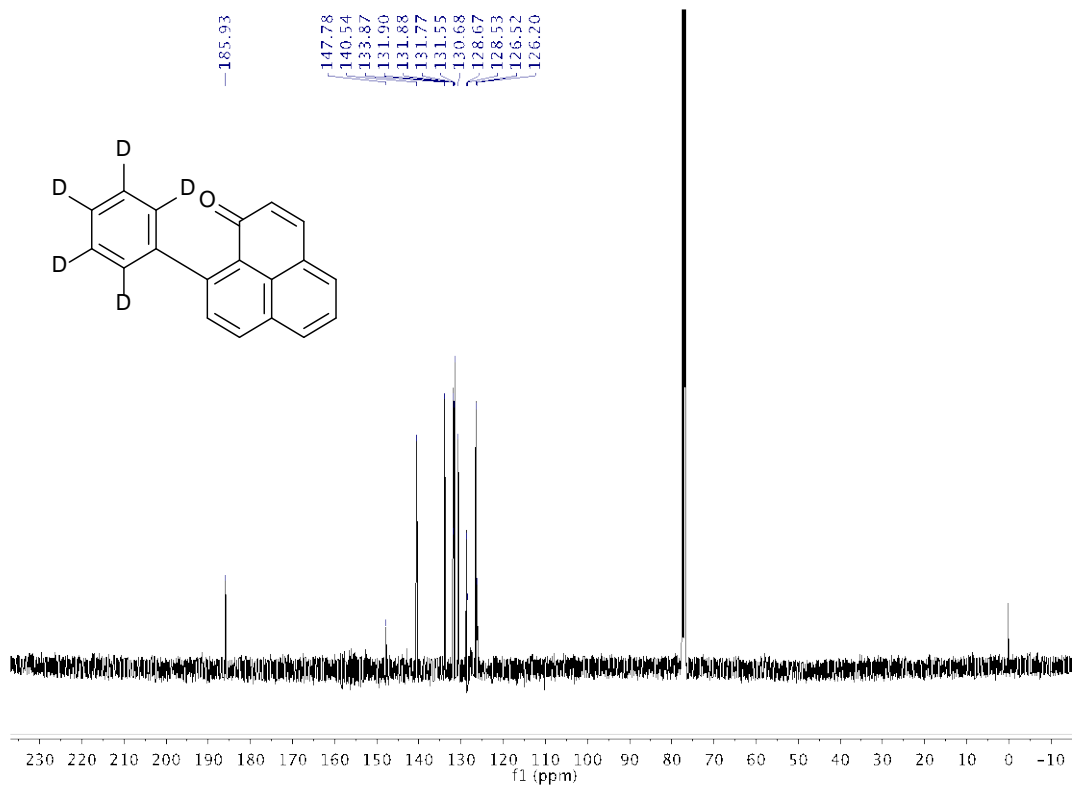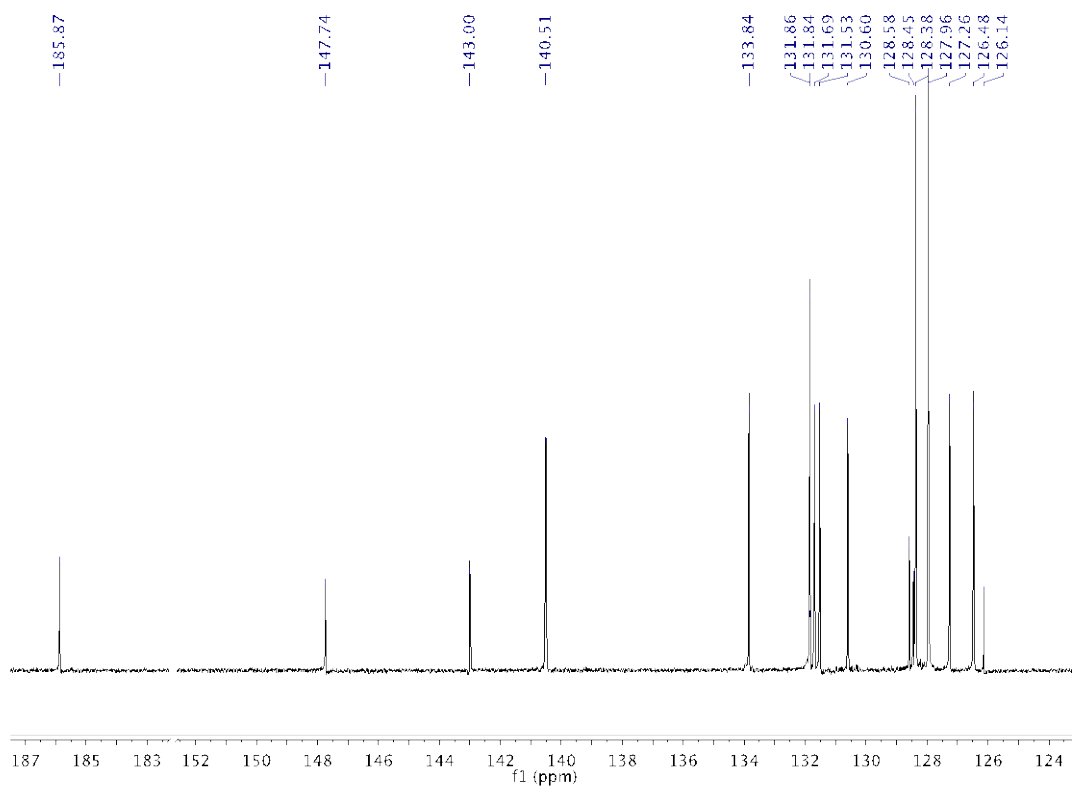

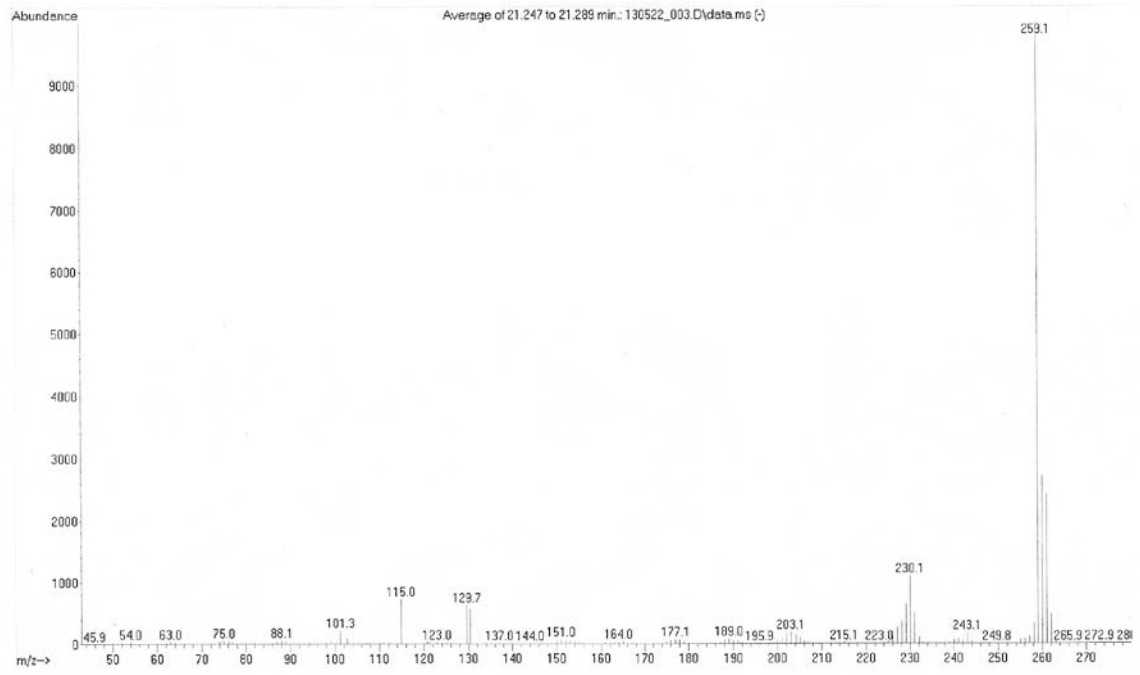

Spin angular momentum vs. C-O distance for *ipso*- and *ortho*-addition in  ${}^3\mathbf{1a}^*$ .

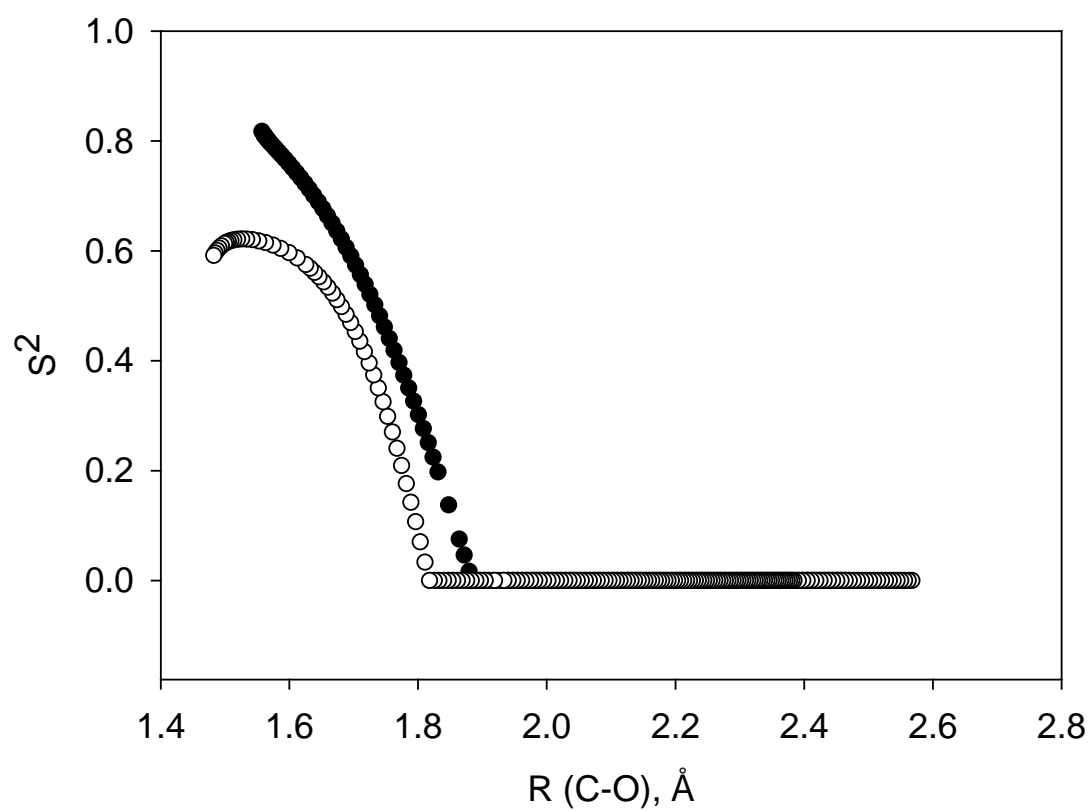

**Figure S1:** Plot of  $S^2$  vs.  $R$  (C-O) for IRC of *ipso*-addition (black circles) or IRC of *ortho*-addition (light circles) of  ${}^3\mathbf{1a}$ .



## ESR Spectra

ESR experiments were performed using a Bruker ElexSys E 500 ESR spectrometer. The ESR spectrum was simulated using Bruker Xsophe simulation software. Lamp photolysis of a deoxygenated solution of TCNE and **1a** in benzene yielded a brownish-yellow solution whose ESR spectrum at ambient temperature is shown in Figure S2A. The overall shape (complex multiplet of a quintet) is consistent with radical **5a**.<sup>12</sup> The spectrum was not observed if air was allowed into the sample. When acetonitrile was used as solvent, the ESR spectrum of the photolysis product showed the characteristic nonet signal of TCNE radical anion with  $g = 2.0026$  and a line spacing of 1.56 Gauss (Figure S2B).

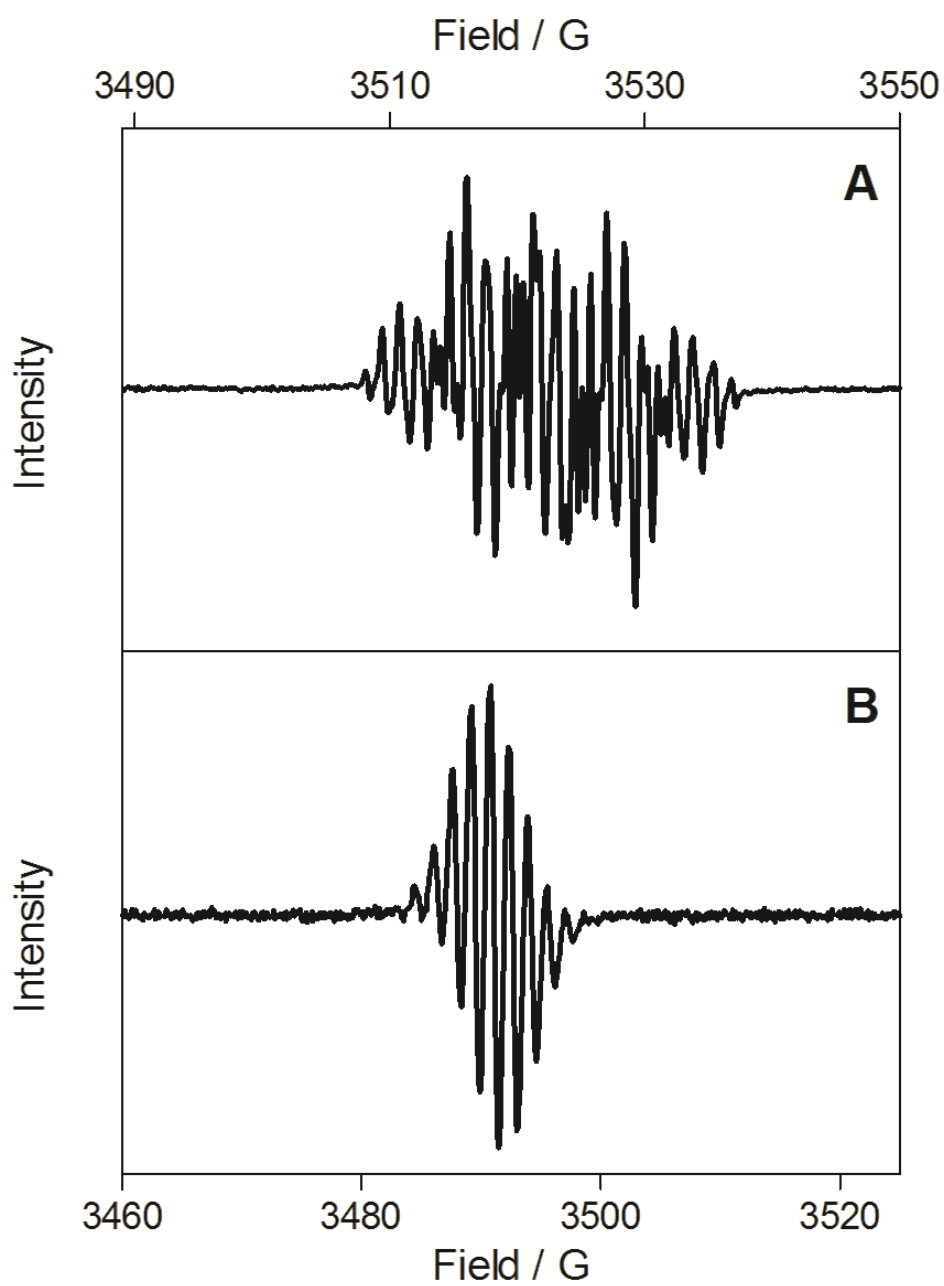

**Figure S2:** ESR spectrum, recorded after 10 min. photolysis of a deoxygenated solution of **1a** and TCNE in (A) benzene and (B) acetonitrile at ambient temperature.

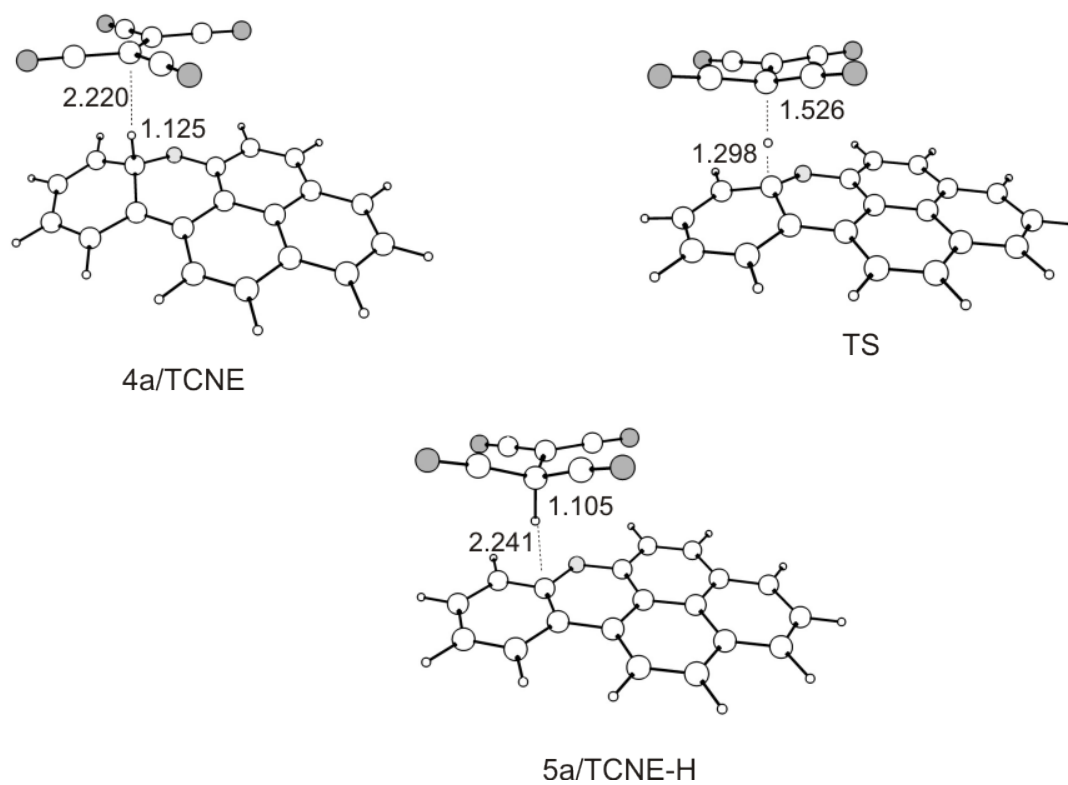

**Figure S3:** Geometries of the **4a/TCNE** complex, the transition state, and the **5a/TCNE-H** complex

## ESI Bibliography:

1. F. Echeverri, F. Torres, W. Quiñones, G. Escobar, and R. Archbold, *Phytochem. Rev.*, 2010, **11**, 1–12.
2. D. Hölscher and B. Schneider, *Phytochemistry*, 1997, **45**, 87–91.
3. F. Otálvaro, J. Nanclares, L. E. Vásquez, W. Quiñones, F. Echeverri, R. Arango, and B. Schneider, *J. Nat. Prod.*, 2007, **70**, 887–890.
4. T. Kamo, N. Kato, N. Hirai, M. Tsuda, D. Fujioka, and H. Ohigashi, *Biosci. Biotechnol. Biochem.*, 1998, **62**, 95–101.
5. R. Cooke and R. Thomas, *Aust. J. Chem.*, 1975, **28**, 1053.
6. D. Hölscher and B. Schneider, *Phytochemistry*, 1999, **50**, 155–161.
7. J. Fang, C. Paetz, D. Hölscher, T. Munde, and B. Schneider, *Phytochem. Lett.*, 2011, **4**, 203–208.
8. S. Opitz, D. Hölscher, N. J. Oldham, S. Bartram, and B. Schneider, *J. Nat. Prod.*, 2002, **65**, 1122–1130.
9. J. M. M. Edwards and U. Weiss, *Phytochemistry*, 1974, **13**, 1597–1602.
10. G. Dora, X.-Q. Xie, and J. M. Edwards, *J. Nat. Prod.*, 1993, **56**, 2029–2033.
11. D. A. Dias, D. J. Goble, C. A. Silva, and S. Urban, *J. Nat. Prod.*, 2009, **72**, 1075–1080.
12. O. Anamimoghadam, M. D. Symes, C. Busche, D.-L. Long, S. T. Caldwell, C. Flors, S. Nonell, L. Cronin, and G. Bucher, *Org. Lett.*, 2013, **15**, 2970–2973.

Optimized geometry (B3LYP/6-31G\*) of 9-phenylphenalenone **1a**.

|   |             |             |             |
|---|-------------|-------------|-------------|
| C | -0.28453900 | -2.02179700 | 0.04358300  |
| C | 1.02904300  | -2.42510400 | 0.08630300  |
| C | 2.07514100  | -1.47248500 | 0.08008900  |
| C | 1.73487200  | -0.08799400 | 0.00238600  |
| C | 0.36320500  | 0.32220000  | -0.05921100 |
| C | -0.65031600 | -0.65055700 | -0.01233500 |
| H | 3.67405200  | -2.92528500 | 0.20263300  |
| H | -1.07926800 | -2.76085900 | 0.07688000  |
| H | 1.27651100  | -3.48273100 | 0.13860600  |
| C | 3.43909400  | -1.86535300 | 0.14498500  |
| C | 2.79895800  | 0.87139800  | -0.01426300 |
| C | 4.11907000  | 0.44415100  | 0.05614700  |
| C | 4.44477900  | -0.92416700 | 0.13542500  |
| H | 4.91402500  | 1.18611800  | 0.04698900  |
| H | 5.48571100  | -1.22964000 | 0.18691800  |
| C | 2.47575200  | 2.28017400  | -0.10801800 |
| C | 1.20118700  | 2.70801300  | -0.21145400 |
| H | 3.30080800  | 2.99012800  | -0.10494300 |
| H | 0.94867400  | 3.75992200  | -0.30238600 |
| C | 0.05815500  | 1.78105500  | -0.23887800 |
| O | -1.07800600 | 2.21575900  | -0.42256800 |
| C | -2.11806800 | -0.37496000 | 0.01674300  |
| C | -2.94633000 | -0.92442400 | -0.97146600 |
| C | -2.71082100 | 0.31603700  | 1.08438200  |
| C | -4.33211800 | -0.76398900 | -0.91117600 |
| H | -2.50012900 | -1.46440600 | -1.80274700 |
| C | -4.09290500 | 0.46144500  | 1.15340900  |
| H | -2.08137700 | 0.74125900  | 1.86019600  |
| C | -4.90983900 | -0.07391200 | 0.15316400  |
| H | -4.95688000 | -1.18308300 | -1.69562000 |
| H | -4.53541700 | 0.99749700  | 1.98886600  |
| H | -5.98858800 | 0.04662500  | 0.20627400  |

E(B3LYP/6-31G(d)): -806.4873976

E(B3LYP/6-31G(d) + ZPE): -806.236566

E(B3LYP/cc-pVTZ//B3LYP/6-31G(d)): -806.7571401

No vibrational mode with imaginary frequency.

Optimized geometry (B3PW91/6-31G\*) of 9-phenylphenalenone **1a**.

|   |             |             |             |
|---|-------------|-------------|-------------|
| C | -0.28432500 | -2.01940800 | 0.03744900  |
| C | 1.02818500  | -2.42159700 | 0.07973800  |
| C | 2.07160700  | -1.46909300 | 0.07675000  |
| C | 1.73094400  | -0.08751900 | 0.00104700  |
| C | 0.36264100  | 0.32086300  | -0.06284700 |
| C | -0.64844400 | -0.65056200 | -0.01693400 |
| H | 3.67004800  | -2.92025600 | 0.19874700  |
| H | -1.08019300 | -2.75829300 | 0.07052600  |
| H | 1.27627000  | -3.47953900 | 0.13045500  |
| C | 3.43343000  | -1.86017400 | 0.14324800  |
| C | 2.79081300  | 0.87183200  | -0.00997900 |
| C | 4.10986400  | 0.44716900  | 0.06267700  |
| C | 4.43682900  | -0.91868000 | 0.13844300  |
| H | 4.90388600  | 1.19081300  | 0.05823300  |
| H | 5.47826300  | -1.22333300 | 0.19148800  |
| C | 2.46619700  | 2.27765600  | -0.09891200 |
| C | 1.19207600  | 2.70292300  | -0.20623800 |
| H | 3.28967500  | 2.99001100  | -0.08959700 |

|   |             |             |             |
|---|-------------|-------------|-------------|
| H | 0.93873800  | 3.75524700  | -0.29517600 |
| C | 0.05453600  | 1.77445900  | -0.24629900 |
| O | -1.07913900 | 2.20222600  | -0.44483600 |
| C | -2.11138500 | -0.37393900 | 0.01590900  |
| C | -2.94110200 | -0.91781400 | -0.97103200 |
| C | -2.69816900 | 0.31061700  | 1.08805600  |
| C | -4.32440400 | -0.75670200 | -0.90532300 |
| H | -2.49676700 | -1.45278300 | -1.80720400 |
| C | -4.07806800 | 0.45635800  | 1.16204800  |
| H | -2.06478000 | 0.73000400  | 1.86454800  |
| C | -4.89719900 | -0.07239600 | 0.16300400  |
| H | -4.95247000 | -1.17093600 | -1.69011700 |
| H | -4.51774900 | 0.98843100  | 2.00191700  |
| H | -5.97595700 | 0.04887300  | 0.22004500  |

E(B3PW91/6-31G(d)): -806.177967

E(B3PW91/6-31G(d) + ZPE): -805.926477

E(B3PW91/cc-pVTZ//B3PW91/6-31G(d)): -806.4309986

No vibrational mode with imaginary frequency.

Optimized geometry (UB3LYP/6-31G\*) of the first excited triplet state of 9-phenylphenalenone, **<sup>3</sup>1a\***.

|   |             |             |             |
|---|-------------|-------------|-------------|
| C | -0.27777100 | -2.05210400 | -0.04885200 |
| C | 1.05486400  | -2.43838100 | 0.01978400  |
| C | 2.08874900  | -1.47277400 | 0.07547600  |
| C | 1.72881000  | -0.08232800 | -0.00281400 |
| C | 0.36812700  | 0.30158100  | -0.11917800 |
| C | -0.66961400 | -0.70849500 | -0.07404800 |
| H | 3.70695800  | -2.88871900 | 0.23486200  |
| H | -1.05042600 | -2.81498000 | -0.02142000 |
| H | 1.31432800  | -3.49250300 | 0.07011500  |
| C | 3.44592900  | -1.83515400 | 0.18633200  |
| C | 2.78197300  | 0.90887000  | 0.01530900  |
| C | 4.14964200  | 0.47918000  | 0.14543800  |
| C | 4.46279600  | -0.85468300 | 0.22813900  |
| H | 4.92766000  | 1.23702700  | 0.16829200  |
| H | 5.49964600  | -1.16620600 | 0.32113800  |
| C | 2.45567800  | 2.26962400  | -0.09238300 |
| C | 1.13437600  | 2.66338100  | -0.25003400 |
| H | 3.24998100  | 3.01079000  | -0.05838500 |
| H | 0.86406500  | 3.70610500  | -0.38362600 |
| C | 0.06699000  | 1.71694900  | -0.33048300 |
| O | -1.10004600 | 2.12806300  | -0.64908900 |
| C | -2.11605800 | -0.40746800 | 0.01135400  |
| C | -3.03258800 | -1.11378400 | -0.78913800 |
| C | -2.62691500 | 0.50292800  | 0.95951800  |
| C | -4.40384500 | -0.90534400 | -0.66296600 |
| H | -2.65874000 | -1.80670300 | -1.53787400 |
| C | -3.99852700 | 0.69973100  | 1.09379200  |
| H | -1.94233000 | 1.03645800  | 1.61008700  |
| C | -4.89358300 | 0.00124400  | 0.28129200  |
| H | -5.09197500 | -1.44710200 | -1.30662600 |
| H | -4.36930300 | 1.40205000  | 1.83549300  |
| H | -5.96368900 | 0.16144000  | 0.38143100  |

E(UB3LYP/6-31G(d)): -806.4227339

E(UB3LYP/6-31G(d) + ZPE): -806.175129

E(UB3LYP/cc-pVTZ//UB3LYP/6-31G(d)): -806.691048

No vibrational mode with imaginary frequency.

Optimized geometry (UB3PW91/6-31G\*) of the first excited triplet state of 9-phenylphenalenone, <sup>3</sup>1a\*.

|   |             |             |             |
|---|-------------|-------------|-------------|
| C | -0.27105000 | -2.05570400 | -0.04808500 |
| C | 1.06146500  | -2.43560600 | 0.02167800  |
| C | 2.08958800  | -1.46655700 | 0.07686100  |
| C | 1.72550900  | -0.08074000 | -0.00288700 |
| C | 0.36562600  | 0.29545200  | -0.11993300 |
| C | -0.66504500 | -0.71483300 | -0.07378100 |
| H | 3.71290100  | -2.87505600 | 0.23511700  |
| H | -1.04249600 | -2.82078100 | -0.01920200 |
| H | 1.32546000  | -3.48890600 | 0.07377000  |
| C | 3.44684300  | -1.82230300 | 0.18681800  |
| C | 2.77040800  | 0.91345500  | 0.01294300  |
| C | 4.13711800  | 0.49249100  | 0.14264200  |
| C | 4.45672000  | -0.83891500 | 0.22713500  |
| H | 4.91218200  | 1.25398300  | 0.16405500  |
| H | 5.49560400  | -1.14475500 | 0.32008100  |
| C | 2.43583100  | 2.27058100  | -0.09482800 |
| C | 1.11344600  | 2.65635000  | -0.24877700 |
| H | 3.22541000  | 3.01736100  | -0.06059500 |
| H | 0.83706500  | 3.69795300  | -0.38236200 |
| C | 0.05500600  | 1.70424300  | -0.33043900 |
| O | -1.11215800 | 2.10572500  | -0.65246700 |
| C | -2.10644400 | -0.41283000 | 0.01199000  |
| C | -3.02372200 | -1.11685000 | -0.78574700 |
| C | -2.61146100 | 0.49976200  | 0.95827300  |
| C | -4.39185200 | -0.90299500 | -0.65905000 |
| H | -2.65155200 | -1.81115800 | -1.53491400 |
| C | -3.98053400 | 0.70208000  | 1.09248800  |
| H | -1.92332200 | 1.02836400  | 1.61032500  |
| C | -4.87676400 | 0.00654200  | 0.28255300  |
| H | -5.08303300 | -1.44269700 | -1.30167000 |
| H | -4.34855900 | 1.40704700  | 1.83343800  |
| H | -5.94652100 | 0.17111000  | 0.38256100  |

E(UB3PW91/6-31G(d)): -806.113708

E(UB3PW91/6-31G(d) + ZPE): -805.865524

E(UB3PW91/cc-pVTZ//UB3PW91/6-31G(d)): -806.691048

No vibrational mode with imaginary frequency.

Optimized geometry (UB3LYP/6-31G\*) for the transition state connecting <sup>3</sup>1a\* and <sup>3</sup>3a\*.

|   |             |             |             |
|---|-------------|-------------|-------------|
| C | -3.58477500 | -1.69032700 | 0.00003700  |
| C | -2.19141600 | -1.42658800 | 0.00001600  |
| C | -1.16998400 | -2.42210200 | -0.00003700 |
| C | -4.49996600 | -0.63529700 | 0.00005200  |
| C | -1.78779900 | -0.05789200 | 0.00002400  |
| C | -2.71400700 | 1.02849800  | 0.00001600  |
| C | -4.09176900 | 0.70111700  | 0.00003700  |
| C | -2.18143500 | 2.35182500  | -0.00003000 |
| H | -2.87713300 | 3.18755800  | -0.00003700 |
| C | -0.80912600 | 2.62115000  | -0.00007200 |
| C | 0.09554500  | 1.54709200  | -0.00005500 |
| C | -0.41652300 | 0.23024200  | 0.00001900  |
| C | 0.58030000  | -0.75369800 | -0.00002000 |
| C | 0.19069200  | -2.09665600 | -0.00007100 |

|   |             |             |             |
|---|-------------|-------------|-------------|
| H | 0.93329300  | -2.89050500 | -0.00011900 |
| H | -5.56356300 | -0.86076800 | 0.00006600  |
| H | -4.83320800 | 1.49625100  | 0.00003500  |
| H | -0.44383100 | 3.64297900  | -0.00011500 |
| H | -1.46439500 | -3.46847300 | -0.00006200 |
| H | -3.93693200 | -2.71872900 | 0.00003400  |
| O | 1.42682000  | 1.61209200  | -0.00008200 |
| C | 1.96133400  | -0.15634500 | -0.00001500 |
| C | 2.73187300  | -0.21781400 | 1.23647200  |
| C | 2.73194100  | -0.21792600 | -1.23644600 |
| C | 4.10647800  | -0.18170100 | 1.22280200  |
| H | 2.18025300  | -0.25782300 | 2.17034800  |
| C | 4.10655400  | -0.18179300 | -1.22269700 |
| H | 2.18037700  | -0.25803800 | -2.17035200 |
| C | 4.80873300  | -0.15133600 | 0.00007100  |
| H | 4.65804100  | -0.19400100 | 2.15885100  |
| H | 4.65817200  | -0.19417900 | -2.15871200 |
| H | 5.89447600  | -0.12369300 | 0.00010200  |

E(UB3LYP/6-31G(d)): -806.405456

E(UB3LYP/6-31G(d) + ZPE): -806.158366

E(UB3LYP/cc-pVTZ//UB3LYP/6-31G(d)): -806.673618

One vibrational mode with imaginary frequency.

Optimized geometry (UB3PW91/6-31G\*) for the transition state connecting <sup>3</sup>1a\* and <sup>3</sup>3a\*.

|   |             |             |             |
|---|-------------|-------------|-------------|
| C | -3.58542500 | -1.67657000 | 0.00000700  |
| C | -2.19323300 | -1.41899200 | 0.00000800  |
| C | -1.18035200 | -2.41917200 | 0.00002400  |
| C | -4.49488400 | -0.61938600 | -0.00001000 |
| C | -1.78304000 | -0.05496000 | -0.00000700 |
| C | -2.70346100 | 1.03263000  | -0.00002400 |
| C | -4.08072700 | 0.71282000  | -0.00002500 |
| C | -2.16713900 | 2.35136900  | -0.00003900 |
| H | -2.85965100 | 3.19026600  | -0.00005300 |
| C | -0.79699200 | 2.61555300  | -0.00003800 |
| C | 0.10578300  | 1.54058500  | -0.00002100 |
| C | -0.41169100 | 0.22635500  | -0.00000500 |
| C | 0.57743300  | -0.76360100 | 0.00001000  |
| C | 0.17964200  | -2.10229200 | 0.00002500  |
| H | 0.91828500  | -2.90025000 | 0.00003700  |
| H | -5.55979300 | -0.84010500 | -0.00001000 |
| H | -4.81833900 | 1.51196600  | -0.00003700 |
| H | -0.42805000 | 3.63645400  | -0.00005000 |
| H | -1.48121700 | -3.46416600 | 0.00003500  |
| H | -3.94190300 | -2.70383700 | 0.00001800  |
| O | 1.42853700  | 1.61170700  | -0.00001800 |
| C | 1.96171900  | -0.19159500 | 0.00001000  |
| C | 2.72446200  | -0.23775400 | 1.23256000  |
| C | 2.72447600  | -0.23779100 | -1.23253000 |
| C | 4.09795200  | -0.17374600 | 1.22042000  |
| H | 2.17229500  | -0.28911800 | 2.16603300  |
| C | 4.09796700  | -0.17378200 | -1.22037600 |
| H | 2.17232000  | -0.28918300 | -2.16600700 |
| C | 4.79698700  | -0.12920300 | 0.00002600  |
| H | 4.64924300  | -0.17436600 | 2.15698600  |
| H | 4.64926900  | -0.17443000 | -2.15693400 |
| H | 5.88238200  | -0.07969900 | 0.00003200  |



E(UB3PW91/6-31G(d)): -806.0998913  
E(UB3PW91/6-31G(d) + ZPE): -805.852069  
E(UB3PW91/cc-pVTZ//UB3PW91/6-31G(d)): -806.3519993  
One vibrational mode with imaginary frequency.

Optimized geometry (UB3LYP/6-31G\*) for the transition state connecting <sup>3</sup>1a\* and <sup>3</sup>4a\*.

|   |             |             |             |
|---|-------------|-------------|-------------|
| C | 3.62553200  | -1.59503200 | 0.11907400  |
| C | 2.22643400  | -1.38458900 | 0.10093200  |
| C | 1.29607300  | -2.45852700 | 0.15219400  |
| C | 4.50880000  | -0.52128500 | 0.04326800  |
| C | 1.72551800  | -0.04443500 | 0.01216200  |
| C | 2.64477200  | 1.04938700  | -0.08579200 |
| C | 4.03261700  | 0.78382100  | -0.06135700 |
| C | 2.11958100  | 2.36552600  | -0.20908400 |
| H | 2.81241900  | 3.20063900  | -0.27860900 |
| C | 0.75928100  | 2.59977100  | -0.23490200 |
| C | -0.16717500 | 1.53405700  | -0.16354500 |
| C | 0.31828800  | 0.18832700  | -0.00552900 |
| C | -0.58413300 | -0.91760100 | 0.07379700  |
| C | -0.06712600 | -2.22373200 | 0.12981000  |
| H | -0.75792900 | -3.05996200 | 0.20091700  |
| H | 5.58017600  | -0.70344500 | 0.05883800  |
| H | 4.72847100  | 1.61624300  | -0.13039700 |
| H | 0.36317100  | 3.60558200  | -0.33277900 |
| H | 1.67261400  | -3.47591700 | 0.21897000  |
| H | 4.00277100  | -2.61215100 | 0.18800200  |
| O | -1.45867900 | 1.81475100  | -0.26661700 |
| C | -2.02016900 | -0.64341900 | 0.09280900  |
| C | -2.96365800 | -1.40172900 | -0.60092500 |
| C | -2.45424200 | 0.55202700  | 0.78026500  |
| C | -4.30498300 | -1.01149000 | -0.63706100 |
| H | -2.64046700 | -2.27673800 | -1.15741800 |
| C | -3.83436000 | 0.91737800  | 0.74202900  |
| H | -1.88243000 | 0.86593000  | 1.64825900  |
| C | -4.73552000 | 0.15965200  | 0.02423700  |
| H | -5.02147100 | -1.60642900 | -1.19664800 |
| H | -4.15763900 | 1.79605700  | 1.29186600  |
| H | -5.78342400 | 0.44352500  | -0.01236300 |

E(UB3LYP/6-31G(d)): -806.415127  
E(UB3LYP/6-31G(d) + ZPE): -806.166780  
E(UB3LYP/cc-pVTZ//UB3LYP/6-31G(d)): -806.682804  
One vibrational mode with imaginary frequency.

Optimized geometry (UB3PW91/6-31G\*) for the transition state connecting <sup>3</sup>1a\* and <sup>3</sup>4a\*.

|   |            |             |             |
|---|------------|-------------|-------------|
| C | 3.61593300 | -1.59499300 | 0.12573100  |
| C | 2.21962200 | -1.38245800 | 0.10301500  |
| C | 1.28961400 | -2.45393700 | 0.14985700  |
| C | 4.50026500 | -0.52403400 | 0.05264400  |
| C | 1.72214700 | -0.04422900 | 0.01260800  |
| C | 2.64121000 | 1.04577900  | -0.08407400 |
| C | 4.02689900 | 0.77945500  | -0.05472600 |
| C | 2.11899600 | 2.35980000  | -0.21176400 |
| H | 2.81273000 | 3.19475800  | -0.28025300 |
| C | 0.76095100 | 2.59583600  | -0.24265800 |

|   |             |             |             |
|---|-------------|-------------|-------------|
| C | -0.16665100 | 1.53261400  | -0.17144200 |
| C | 0.31819100  | 0.18971500  | -0.00958500 |
| C | -0.58420800 | -0.91227100 | 0.06718100  |
| C | -0.07154300 | -2.21760000 | 0.12262600  |
| H | -0.76491300 | -3.05250800 | 0.19198500  |
| H | 5.57157300  | -0.70799600 | 0.07193800  |
| H | 4.72412300  | 1.61128900  | -0.12270300 |
| H | 0.36676300  | 3.60236400  | -0.34498300 |
| H | 1.66465400  | -3.47224000 | 0.21761500  |
| H | 3.99156000  | -2.61303100 | 0.19571700  |
| O | -1.45099600 | 1.81354700  | -0.27972800 |
| C | -2.01675000 | -0.63666900 | 0.08826000  |
| C | -2.95678200 | -1.38327900 | -0.62185700 |
| C | -2.45355700 | 0.53569800  | 0.79860400  |
| C | -4.29576400 | -0.99630500 | -0.64795900 |
| H | -2.62974900 | -2.24464700 | -1.19798300 |
| C | -3.82787700 | 0.89908500  | 0.77192900  |
| H | -1.86179300 | 0.86336000  | 1.64844600  |
| C | -4.72816900 | 0.15582400  | 0.03927500  |
| H | -5.01157000 | -1.58001800 | -1.22088200 |
| H | -4.15353400 | 1.76392600  | 1.34256500  |
| H | -5.77703100 | 0.43817800  | 0.01037700  |

E(UB3PW91/6-31G(d)): -806.1084454

E(UB3PW91/6-31G(d) + ZPE): -805.859444

E(UB3PW91/cc-pVTZ//UB3PW91/6-31G(d)): -806.360117

One vibrational mode with imaginary frequency.

Optimized geometry (UB3LYP/6-31G\*) for triplet biradical **<sup>3</sup>3a\***.

|   |             |             |             |
|---|-------------|-------------|-------------|
| C | -0.32717200 | -2.00368200 | -0.00003200 |
| C | 1.01716300  | -2.40578100 | -0.00001300 |
| C | 2.10330600  | -1.47650100 | 0.00000600  |
| C | 1.78392200  | -0.08839500 | 0.00000300  |
| C | 0.43550100  | 0.26473800  | 0.00000200  |
| C | -0.62469700 | -0.63939200 | -0.00001900 |
| H | 3.78880800  | -2.85127600 | 0.00003100  |
| H | -1.11318400 | -2.75417900 | -0.00004900 |
| H | 1.24748700  | -3.46827300 | -0.00001700 |
| C | 3.48240900  | -1.80839800 | 0.00002600  |
| C | 2.75050500  | 0.96026200  | 0.00000300  |
| C | 4.11107500  | 0.56266800  | 0.00002500  |
| C | 4.44634000  | -0.79529000 | 0.00003800  |
| H | 4.89551700  | 1.31525100  | 0.00002600  |
| H | 5.49727100  | -1.07388800 | 0.00005200  |
| C | 2.26788200  | 2.30439900  | -0.00003100 |
| C | 0.90035400  | 2.63363100  | -0.00002300 |
| H | 2.99513600  | 3.11238600  | -0.00007400 |
| H | 0.58043800  | 3.67044900  | -0.00004900 |
| C | -0.02176200 | 1.58839700  | 0.00002200  |
| O | -1.38166300 | 1.62865700  | -0.00010900 |
| C | -1.91616000 | 0.18723700  | -0.00003000 |
| C | -2.72370100 | 0.02206200  | 1.25189800  |
| C | -2.72376300 | 0.02194600  | -1.25190400 |
| C | -4.05843100 | -0.27082300 | 1.22586100  |
| H | -2.18905600 | 0.14656900  | 2.18875400  |
| C | -4.05849300 | -0.27093600 | -1.22577300 |
| H | -2.18916500 | 0.14636600  | -2.18879700 |
| C | -4.75221200 | -0.42724700 | 0.00006800  |
| H | -4.59956600 | -0.38450700 | 2.16193800  |

|   |             |             |             |
|---|-------------|-------------|-------------|
| H | -4.59967300 | -0.38470500 | -2.16181300 |
| H | -5.81309800 | -0.65681900 | 0.00010600  |

E(UB3LYP/6-31G(d)): -806.409747  
E(UB3LYP/6-31G(d) + ZPE): -806.161769  
E(UB3LYP/cc-pVTZ//UB3LYP/6-31G(d)): -806.677466  
No vibrational mode with imaginary frequency.

Optimized geometry (UB3PW91/6-31G\*) for triplet biradical <sup>3</sup>3a\*.

|   |             |             |             |
|---|-------------|-------------|-------------|
| C | -0.34203800 | -1.99158100 | 0.00003100  |
| C | 0.99835600  | -2.39947900 | 0.00003400  |
| C | 2.08828300  | -1.47825700 | 0.00001600  |
| C | 1.77817200  | -0.09109300 | -0.00000500 |
| C | 0.43399300  | 0.26800700  | -0.00000600 |
| C | -0.63049400 | -0.62732500 | 0.00001100  |
| H | 3.76546900  | -2.86137100 | 0.00003100  |
| H | -1.13237200 | -2.73792300 | 0.00004400  |
| H | 1.22260500  | -3.46367300 | 0.00004900  |
| C | 3.46341700  | -1.81688000 | 0.00001600  |
| C | 2.74660100  | 0.95162100  | -0.00002500 |
| C | 4.10331500  | 0.54831300  | -0.00002400 |
| C | 4.43072200  | -0.80949300 | -0.00000400 |
| H | 4.89219400  | 1.29671100  | -0.00003900 |
| H | 5.48054100  | -1.09352500 | -0.00000400 |
| C | 2.26990300  | 2.29518000  | -0.00004500 |
| C | 0.90595600  | 2.63100100  | -0.00004600 |
| H | 3.00050300  | 3.10064200  | -0.00006100 |
| H | 0.59174500  | 3.66994700  | -0.00006200 |
| C | -0.01877200 | 1.59068300  | -0.00002700 |
| O | -1.37381000 | 1.63343300  | -0.00002500 |
| C | -1.90869800 | 0.21286000  | 0.00000100  |
| C | -2.71408400 | 0.04326100  | 1.24966900  |
| C | -2.71409900 | 0.04321800  | -1.24965100 |
| C | -4.04069400 | -0.27868800 | 1.22394300  |
| H | -2.18208500 | 0.18385300  | 2.18626000  |
| C | -4.04070900 | -0.27873000 | -1.22389700 |
| H | -2.18211200 | 0.18377800  | -2.18625300 |
| C | -4.72932900 | -0.45288600 | 0.00003000  |
| H | -4.57973300 | -0.39946000 | 2.16067700  |
| H | -4.57975900 | -0.39953600 | -2.16062000 |
| H | -5.78531800 | -0.70530500 | 0.00004100  |

E(UB3PW91/6-31G(d)): -806.106555  
E(UB3PW91/6-31G(d) + ZPE): -805.857753  
E(UB3PW91/cc-pVTZ//UB3PW91/6-31G(d)): -806.358516  
No vibrational mode with imaginary frequency.

Optimized geometry (UB3LYP/6-31G\*) for the first triplet excited state of 4a, <sup>3</sup>4a\*.

|   |            |             |             |
|---|------------|-------------|-------------|
| C | 3.66428000 | -1.55715500 | 0.06979700  |
| C | 2.25600300 | -1.37556900 | 0.07421600  |
| C | 1.34569900 | -2.46124300 | 0.13114300  |
| C | 4.52047000 | -0.46441800 | -0.00485700 |
| C | 1.73134900 | -0.04572700 | 0.01135000  |
| C | 2.62077300 | 1.07195000  | -0.08153800 |
| C | 4.01590500 | 0.83433600  | -0.08366700 |
| C | 2.06286600 | 2.37514200  | -0.17774100 |

|   |             |             |             |
|---|-------------|-------------|-------------|
| H | 2.73165900  | 3.22841200  | -0.25431200 |
| C | 0.68958300  | 2.57523400  | -0.16960200 |
| C | -0.18151300 | 1.48737300  | -0.07337500 |
| C | 0.31986400  | 0.15531400  | 0.02085000  |
| C | -0.56785500 | -0.96001700 | 0.06376200  |
| C | -0.02710900 | -2.25240100 | 0.12084000  |
| H | -0.69600400 | -3.10631200 | 0.18294300  |
| H | 5.59571400  | -0.62276700 | -0.00792500 |
| H | 4.69422000  | 1.68116400  | -0.15036000 |
| H | 0.26512800  | 3.57208200  | -0.23661300 |
| H | 1.73880300  | -3.47313400 | 0.18701900  |
| H | 4.06385600  | -2.56666300 | 0.12111700  |
| O | -1.51896900 | 1.73640800  | -0.09139100 |
| C | -2.00249500 | -0.66698600 | 0.04400300  |
| C | -2.99006200 | -1.52020800 | -0.37984400 |
| C | -2.35231000 | 0.71012200  | 0.54662000  |
| C | -4.35267700 | -1.12628800 | -0.41032100 |
| H | -2.72462400 | -2.51196500 | -0.73733400 |
| C | -3.78441800 | 1.09174900  | 0.38272100  |
| H | -2.08197600 | 0.76785200  | 1.61918000  |
| C | -4.72038300 | 0.19005500  | -0.04629900 |
| H | -5.10684700 | -1.82694900 | -0.75430600 |
| H | -4.05347300 | 2.10871400  | 0.65256300  |
| H | -5.76252100 | 0.49071500  | -0.11918500 |

E(UB3LYP/6-31G(d)): -806.428841

E(UB3LYP/6-31G(d) + ZPE): -806.179482

E(UB3LYP/cc-pVTZ//UB3LYP/6-31G(d)): -806.695508

No vibrational mode with imaginary frequency.

Optimized geometry (UB3PW91/6-31G\*) for the first triplet excited state of **4a**, <sup>3</sup>**4a**\*

|   |             |             |             |
|---|-------------|-------------|-------------|
| C | 3.65773700  | -1.55302700 | 0.07266600  |
| C | 2.25165200  | -1.37221600 | 0.07547600  |
| C | 1.34407200  | -2.45726900 | 0.13193300  |
| C | 4.51221800  | -0.46124300 | -0.00189500 |
| C | 1.72734200  | -0.04547100 | 0.01153800  |
| C | 2.61383900  | 1.07049700  | -0.08181400 |
| C | 4.00718800  | 0.83505100  | -0.08254800 |
| C | 2.05588200  | 2.37089200  | -0.18056200 |
| H | 2.72391100  | 3.22510400  | -0.25850400 |
| C | 0.68437000  | 2.56977500  | -0.17285600 |
| C | -0.18450200 | 1.48265800  | -0.07392900 |
| C | 0.31846000  | 0.15383200  | 0.02009000  |
| C | -0.56666200 | -0.95971500 | 0.05995800  |
| C | -0.02716000 | -2.24998000 | 0.11885300  |
| H | -0.69614200 | -3.10443300 | 0.18086800  |
| H | 5.58786600  | -0.61891500 | -0.00376600 |
| H | 4.68498800  | 1.68270900  | -0.14977800 |
| H | 0.25923700  | 3.56666600  | -0.24134500 |
| H | 1.73811400  | -3.46910300 | 0.18957100  |
| H | 4.05811600  | -2.56255800 | 0.12508500  |
| O | -1.51670000 | 1.72975700  | -0.08944300 |
| C | -1.99780500 | -0.66522600 | 0.03832300  |
| C | -2.98487000 | -1.51590200 | -0.38561500 |
| C | -2.34189600 | 0.70737700  | 0.54360600  |
| C | -4.34555200 | -1.12172500 | -0.40942400 |
| H | -2.72011700 | -2.50667000 | -0.74766600 |
| C | -3.77130200 | 1.08937400  | 0.38851600  |

|   |             |             |             |
|---|-------------|-------------|-------------|
| H | -2.06961800 | 0.75690000  | 1.61707700  |
| C | -4.70974400 | 0.19106400  | -0.03878500 |
| H | -5.10186600 | -1.82042600 | -0.75365900 |
| H | -4.03864600 | 2.10612200  | 0.66237300  |
| H | -5.75185300 | 0.49407500  | -0.10590700 |

E(UB3PW91/6-31G(d)): -806.124992

E(UB3PW91/6-31G(d) + ZPE): -805.874928

E(UB3PW91/cc-pVTZ//UB3PW91/6-31G(d)): -806.376106

No vibrational mode with imaginary frequency.

Optimized geometry (B3LYP/6-31G\*) for **4a**.

|   |             |             |             |
|---|-------------|-------------|-------------|
| C | 3.60931500  | -1.59033100 | 0.05867900  |
| C | 2.23148500  | -1.38440800 | 0.03793100  |
| C | 1.28121700  | -2.47349200 | -0.02652600 |
| C | 4.50394200  | -0.50400000 | 0.06136600  |
| C | 1.72548300  | -0.04781100 | 0.03645500  |
| C | 2.63370800  | 1.05212100  | -0.01319900 |
| C | 4.02836800  | 0.79246400  | 0.01581100  |
| C | 2.10038000  | 2.36476300  | -0.12970300 |
| H | 2.78477300  | 3.20815500  | -0.17665300 |
| C | 0.74143100  | 2.57961800  | -0.18797800 |
| C | -0.15056000 | 1.49205700  | -0.07519000 |
| C | 0.31944000  | 0.17832800  | 0.04064100  |
| C | -0.62121300 | -0.93461000 | 0.01115700  |
| C | -0.05946300 | -2.26275500 | -0.07284900 |
| H | -0.72990300 | -3.11477300 | -0.11941400 |
| H | 5.57404000  | -0.69053200 | 0.08101100  |
| H | 4.71933400  | 1.63166500  | -0.00960900 |
| H | 0.32627700  | 3.57709300  | -0.29111700 |
| H | 1.67171600  | -3.48835300 | -0.04695300 |
| H | 3.99441300  | -2.60730100 | 0.06101200  |
| O | -1.47955400 | 1.76573300  | -0.14851900 |
| C | -1.97331500 | -0.64517800 | 0.07812200  |
| C | -3.04095500 | -1.57761600 | -0.11907900 |
| C | -2.33445200 | 0.77840800  | 0.48109100  |
| C | -4.34285700 | -1.17439100 | -0.16662100 |
| H | -2.80159400 | -2.62218500 | -0.29575600 |
| C | -3.75014200 | 1.16585900  | 0.17253400  |
| H | -2.15137000 | 0.88229400  | 1.57212000  |
| C | -4.68763100 | 0.23175600  | -0.07245100 |
| H | -5.13116600 | -1.89842300 | -0.35029300 |
| H | -3.98351900 | 2.22563200  | 0.21716100  |
| H | -5.72165300 | 0.52617200  | -0.23450500 |

E(B3LYP/6-31G(d)): -806.454169

E(B3LYP/6-31G(d) + ZPE): -806.202291

E(B3LYP/cc-pVTZ//B3LYP/6-31G(d)): -806.722191

E(B3LYP/cc-pVTZ//B3LYP/6-31G(d)): -806.727263 (pcm in benzene)

E(B3LYP/cc-pVTZ//B3LYP/6-31G(d)): -806.735240 (pcm in acetonitrile)

E(B3LYP/cc-pVTZ//B3LYP/6-31G(d)): -806.735776 (pcm in water)

No vibrational mode with imaginary frequency.

Optimized geometry (B3PW91/6-31G\*) for **4a**.

|   |            |             |             |
|---|------------|-------------|-------------|
| C | 3.60377200 | -1.58535500 | 0.06423100  |
| C | 2.22737800 | -1.38097000 | 0.03994000  |
| C | 1.28105600 | -2.46907600 | -0.02897100 |

|   |             |             |             |
|---|-------------|-------------|-------------|
| C | 4.49561900  | -0.49992700 | 0.06951200  |
| C | 1.72126200  | -0.04756400 | 0.03772100  |
| C | 2.62638900  | 1.05113200  | -0.01146900 |
| C | 4.01899100  | 0.79435900  | 0.02146100  |
| C | 2.09267900  | 2.36056200  | -0.13333600 |
| H | 2.77594400  | 3.20530300  | -0.18109600 |
| C | 0.73542200  | 2.57324900  | -0.19666800 |
| C | -0.15419600 | 1.48677400  | -0.08022800 |
| C | 0.31773800  | 0.17584800  | 0.03965300  |
| C | -0.61897700 | -0.93494400 | 0.00521300  |
| C | -0.05857600 | -2.25964800 | -0.07999600 |
| H | -0.72811900 | -3.11280200 | -0.13017400 |
| H | 5.56624400  | -0.68494100 | 0.09218200  |
| H | 4.70931000  | 1.63457400  | -0.00340600 |
| H | 0.31959600  | 3.57037000  | -0.30481100 |
| H | 1.67225200  | -3.48405500 | -0.04922500 |
| H | 3.98991400  | -2.60234000 | 0.06704200  |
| O | -1.47807200 | 1.75748900  | -0.15435100 |
| C | -1.96953600 | -0.64414900 | 0.07170400  |
| C | -3.03526400 | -1.57323000 | -0.12647600 |
| C | -2.32319900 | 0.77468400  | 0.47873600  |
| C | -4.33624700 | -1.16956200 | -0.16284300 |
| H | -2.79748400 | -2.61696100 | -0.31270900 |
| C | -3.73731500 | 1.16373000  | 0.18462500  |
| H | -2.13114900 | 0.87380400  | 1.56928500  |
| C | -4.67766000 | 0.23312800  | -0.05771200 |
| H | -5.12597700 | -1.89235000 | -0.34729500 |
| H | -3.96974300 | 2.22384700  | 0.23517200  |
| H | -5.71221900 | 0.53140000  | -0.21073400 |

E(B3PW91/6-31G(d)): -806.1490578

E(B3PW91/6-31G(d) + ZPE): -805.896471

E(B3PW91/cc-pVTZ//B3PW91/6-31G(d)): -806.401331

No vibrational mode with imaginary frequency.

Optimized geometry (B3LYP/6-31G\*) for the transition state connecting **4a** and **1a**.

|   |             |             |             |
|---|-------------|-------------|-------------|
| C | 3.60998800  | -1.57981300 | 0.12864900  |
| C | 2.22233800  | -1.36962000 | 0.13364900  |
| C | 1.28559400  | -2.45616300 | 0.11396200  |
| C | 4.49900600  | -0.50783700 | 0.03257800  |
| C | 1.71148400  | -0.03734000 | 0.08544800  |
| C | 2.62536200  | 1.04307100  | -0.09715400 |
| C | 4.00944900  | 0.78772500  | -0.10192500 |
| C | 2.08951000  | 2.34369100  | -0.35759800 |
| H | 2.78054300  | 3.16557600  | -0.53168700 |
| C | 0.74248800  | 2.56375100  | -0.41068400 |
| C | -0.18671200 | 1.53403300  | -0.04145100 |
| C | 0.30396800  | 0.19544500  | 0.15930500  |
| C | -0.60867300 | -0.91618700 | 0.13965200  |
| C | -0.05969700 | -2.23811900 | 0.05483500  |
| H | -0.74328000 | -3.08112600 | 0.03446200  |
| H | 5.56989900  | -0.68851900 | 0.02882500  |
| H | 4.69703200  | 1.61989700  | -0.23383900 |
| H | 0.33209100  | 3.54585500  | -0.62146000 |
| H | 1.67281000  | -3.47243600 | 0.12997200  |
| H | 3.98838400  | -2.59811900 | 0.17792800  |
| O | -1.42923000 | 1.88362000  | 0.08998800  |
| C | -2.00305600 | -0.65946900 | 0.13973400  |

|   |             |             |             |
|---|-------------|-------------|-------------|
| C | -2.95260800 | -1.47124000 | -0.53699900 |
| C | -2.42872800 | 0.59467600  | 0.75824100  |
| C | -4.26136300 | -1.07666300 | -0.67144800 |
| H | -2.61272900 | -2.38784100 | -1.01221400 |
| C | -3.81887100 | 0.97348800  | 0.57953200  |
| H | -2.00793000 | 0.77903300  | 1.74921300  |
| C | -4.67865500 | 0.17057000  | -0.11346700 |
| H | -4.96986300 | -1.68751600 | -1.22197900 |
| H | -4.16017200 | 1.89879900  | 1.03397400  |
| H | -5.71789100 | 0.47344300  | -0.22226600 |

E(B3LYP/6-31G(d)): -806.441450

E(B3LYP/6-31G(d) + ZPE): -806.191115

E(B3LYP/cc-pVTZ//B3LYP/6-31G(d)): -806.709497

One vibrational mode with imaginary frequency.

Optimized geometry (B3PW91/6-31G\*) for the transition state connecting **4a** and **1a**.

|   |             |             |             |
|---|-------------|-------------|-------------|
| C | 3.60530500  | -1.57276400 | 0.13613000  |
| C | 2.21858200  | -1.36514800 | 0.13754500  |
| C | 1.28679900  | -2.45148200 | 0.11408500  |
| C | 4.49059600  | -0.50127800 | 0.04014300  |
| C | 1.70656900  | -0.03654500 | 0.08743600  |
| C | 2.61662000  | 1.04274700  | -0.09792700 |
| C | 3.99852300  | 0.79142200  | -0.10009200 |
| C | 2.07910700  | 2.33853800  | -0.36845100 |
| H | 2.76862000  | 3.16103000  | -0.54814800 |
| C | 0.73374100  | 2.55475000  | -0.42672800 |
| C | -0.19273000 | 1.52950600  | -0.04288800 |
| C | 0.30177200  | 0.19300000  | 0.16130900  |
| C | -0.60514900 | -0.91683700 | 0.13671200  |
| C | -0.05766700 | -2.23519000 | 0.04941500  |
| H | -0.74144400 | -3.07873500 | 0.02542800  |
| H | 5.56225300  | -0.67934100 | 0.03889200  |
| H | 4.68479100  | 1.62464500  | -0.23539600 |
| H | 0.32147500  | 3.53455100  | -0.64662200 |
| H | 1.67533500  | -3.46762500 | 0.13148600  |
| H | 3.98547100  | -2.59071000 | 0.18766400  |
| O | -1.42679700 | 1.87918300  | 0.09786400  |
| C | -1.99912500 | -0.65945400 | 0.13570800  |
| C | -2.94172800 | -1.45764800 | -0.55873400 |
| C | -2.42106000 | 0.58134700  | 0.76904600  |
| C | -4.25013300 | -1.06240600 | -0.68727800 |
| H | -2.59872800 | -2.36452600 | -1.05137700 |
| C | -3.80881600 | 0.95709200  | 0.60639600  |
| H | -1.98533600 | 0.76253200  | 1.75464300  |
| C | -4.66772900 | 0.16797200  | -0.10313900 |
| H | -4.95710100 | -1.66303100 | -1.25150200 |
| H | -4.15380000 | 1.87048400  | 1.08242800  |
| H | -5.70802700 | 0.47153000  | -0.20253600 |

E(B3PW91/6-31G(d)): -806.135029

E(B3PW91/6-31G(d) + ZPE): -805.884013

E(B3PW91/cc-pVTZ//B3PW91/6-31G(d)): -806.387056

One vibrational mode with imaginary frequency.

Optimized geometry (B3LYP/6-31G\*) for the transition state of hydrogen abstraction from **4a** by TCNE.

|   |             |             |             |
|---|-------------|-------------|-------------|
| C | -4.96811800 | 0.62743300  | 0.75083300  |
| C | -3.63800200 | 0.96858300  | 0.47755400  |
| C | -3.08169400 | 2.24813900  | 0.81965100  |
| C | -5.47758100 | -0.62323000 | 0.38061100  |
| C | -2.79851300 | 0.02126000  | -0.17888300 |
| C | -3.32359700 | -1.24377200 | -0.57273200 |
| C | -4.67219500 | -1.54394200 | -0.27464300 |
| C | -2.47086400 | -2.15259500 | -1.26245700 |
| H | -2.86338100 | -3.12147700 | -1.55724600 |
| C | -1.16339400 | -1.83558400 | -1.54364800 |
| C | -0.64677400 | -0.59170400 | -1.12432000 |
| C | -1.44134200 | 0.35169100  | -0.44970400 |
| C | -0.90736400 | 1.64221300  | -0.10121100 |
| C | -1.78832400 | 2.57666500  | 0.53290000  |
| H | -1.41524800 | 3.55499900  | 0.81338600  |
| H | -6.51090000 | -0.87061100 | 0.60428900  |
| H | -5.07322000 | -2.51068200 | -0.56723200 |
| H | -0.50285400 | -2.52988100 | -2.04877400 |
| H | -3.72184800 | 2.96909100  | 1.32160000  |
| H | -5.60828900 | 1.34703300  | 1.25447200  |
| O | 0.64425200  | -0.33443500 | -1.43750000 |
| C | 0.43633800  | 1.91321400  | -0.42870600 |
| C | 1.08611600  | 3.16989300  | -0.27329400 |
| C | 1.27676300  | 0.80401500  | -0.90087600 |
| C | 2.35029300  | 3.38575400  | -0.76425600 |
| H | 0.55153700  | 3.99050600  | 0.19274400  |
| C | 2.50476300  | 1.12257300  | -1.61966900 |
| H | 1.77147200  | 0.28733600  | 0.20918100  |
| C | 3.04763200  | 2.36361000  | -1.48298600 |
| H | 2.81177700  | 4.36159100  | -0.65064300 |
| H | 2.99837700  | 0.32141500  | -2.15997000 |
| H | 4.00567600  | 2.59107900  | -1.93996500 |
| C | 2.36651300  | -0.65818300 | 1.21245000  |
| C | 2.57597200  | -1.91358600 | 0.54357700  |
| C | 3.73531800  | -2.12300600 | -0.24134100 |
| N | 4.67981200  | -2.28892900 | -0.90844600 |
| C | 1.56185900  | -2.89662100 | 0.51684900  |
| N | 0.71217200  | -3.69765900 | 0.47515200  |
| C | 1.31283500  | -0.55834900 | 2.19921200  |
| N | 0.44480400  | -0.41809000 | 2.95956700  |
| C | 3.52896600  | 0.15343300  | 1.50832900  |
| N | 4.44453400  | 0.83862800  | 1.71497100  |

E(B3LYP/6-31G(d)): -1253.968275

E(B3LYP/6-31G(d) + ZPE): -1253.672812

E(B3LYP/cc-pVTZ//B3LYP/6-31G(d)): -1254.387347

One vibrational mode with imaginary frequency.

Optimized geometry (B3LYP/6-31G\*) for the transition state of hydrogen abstraction from **4a** by *p*-benzoquinone.

|   |            |             |             |
|---|------------|-------------|-------------|
| C | 5.14482000 | -0.86053400 | -0.89916200 |
| C | 4.01504000 | -0.07622500 | -0.64945100 |
| C | 3.92057700 | 1.30094500  | -1.06058200 |
| C | 5.20704300 | -2.19433100 | -0.46521500 |
| C | 2.91115200 | -0.65067800 | 0.05284200  |
| C | 2.98463600 | -2.00069900 | 0.51041400  |



|   |             |             |             |
|---|-------------|-------------|-------------|
| C | 4.15060200  | -2.75665900 | 0.22978100  |
| C | 1.88806000  | -2.52964300 | 1.24412200  |
| H | 1.93698700  | -3.55627300 | 1.59708700  |
| C | 0.77276400  | -1.76528200 | 1.51127700  |
| C | 0.69788000  | -0.44398800 | 1.03154500  |
| C | 1.74971600  | 0.13442000  | 0.30560700  |
| C | 1.67769700  | 1.51388300  | -0.12476500 |
| C | 2.81525300  | 2.05776200  | -0.80242400 |
| H | 2.79187800  | 3.08961100  | -1.13647000 |
| H | 6.09483200  | -2.78477000 | -0.67288900 |
| H | 4.20445500  | -3.78666400 | 0.57290100  |
| H | -0.06801200 | -2.15827500 | 2.07324100  |
| H | 4.76342500  | 1.73653900  | -1.59110800 |
| H | 5.98504800  | -0.42530500 | -1.43424200 |
| O | -0.42252100 | 0.25616200  | 1.35071100  |
| C | 0.49427900  | 2.22059300  | 0.14806500  |
| C | 0.26707300  | 3.59934100  | -0.13680200 |
| C | -0.65824500 | 1.47730900  | 0.66803600  |
| C | -0.88968300 | 4.22936300  | 0.24963700  |
| H | 1.04575300  | 4.17629500  | -0.62450400 |
| C | -1.76000900 | 2.21196800  | 1.25946900  |
| H | -1.23111400 | 1.04745000  | -0.45496500 |
| C | -1.90570100 | 3.53885800  | 0.98482800  |
| H | -1.01870600 | 5.28654200  | 0.03603100  |
| H | -2.48878100 | 1.65259000  | 1.83739100  |
| H | -2.77157000 | 4.08523500  | 1.34637600  |
| O | -1.74561200 | 0.37872900  | -1.37771300 |
| C | -2.75853400 | -0.34880000 | -1.02285300 |
| C | -2.58737600 | -1.74491000 | -0.70333200 |
| C | -3.65009700 | -2.52211700 | -0.36242200 |
| H | -1.57873300 | -2.14568200 | -0.76228900 |
| H | -3.54077900 | -3.57856200 | -0.13399100 |
| C | -4.08239100 | 0.21887000  | -0.93949000 |
| C | -5.15398600 | -0.54485600 | -0.59354900 |
| H | -4.18454900 | 1.27372000  | -1.18241400 |
| H | -6.15929900 | -0.13650000 | -0.54135500 |
| C | -5.01231400 | -1.97421700 | -0.27807600 |
| O | -5.98316400 | -2.67466700 | 0.04277500  |

E(B3LYP/6-31G(d)): -1187.889202

E(B3LYP/6-31G(d) + ZPE): -1187.556062

E(B3LYP/cc-pVTZ//B3LYP/6-31G(d)): -1188.297195

One vibrational mode with imaginary frequency.

Optimized geometry (UB3LYP/6-31G\*) of radical **5a**.

|   |             |             |            |
|---|-------------|-------------|------------|
| C | 3.14966000  | 2.39267800  | 0.00000000 |
| C | 2.29203400  | 1.27012300  | 0.00000000 |
| C | 2.77221700  | -0.07051300 | 0.00000000 |
| C | 2.62797100  | 3.68710400  | 0.00000000 |
| C | 0.87802400  | 1.48371400  | 0.00000000 |
| C | 0.34926500  | 2.81288400  | 0.00000000 |
| C | 1.25438700  | 3.90411700  | 0.00000000 |
| C | -1.06100800 | 2.98302300  | 0.00000000 |
| H | -1.47007500 | 3.98965200  | 0.00000000 |
| C | -1.91629200 | 1.89265100  | 0.00000000 |
| C | -1.39028900 | 0.59880400  | 0.00000000 |
| C | 0.00000000  | 0.35939500  | 0.00000000 |
| C | 0.51184800  | -0.97320200 | 0.00000000 |
| C | 1.90712500  | -1.15052500 | 0.00000000 |

|   |             |             |            |
|---|-------------|-------------|------------|
| H | 2.32339800  | -2.15294300 | 0.00000000 |
| H | 3.30523900  | 4.53720500  | 0.00000000 |
| H | 0.85869000  | 4.91649700  | 0.00000000 |
| H | -2.99440000 | 2.01742800  | 0.00000000 |
| H | 3.84599100  | -0.23921100 | 0.00000000 |
| H | 4.22513600  | 2.23543700  | 0.00000000 |
| O | -2.28794700 | -0.43821200 | 0.00000000 |
| C | -0.46406000 | -2.05933400 | 0.00000000 |
| C | -0.13235600 | -3.42852500 | 0.00000000 |
| C | -1.83820600 | -1.73688300 | 0.00000000 |
| C | -1.11097400 | -4.41576600 | 0.00000000 |
| H | 0.91262900  | -3.72099400 | 0.00000000 |
| C | -2.82839500 | -2.71819600 | 0.00000000 |
| C | -2.46447200 | -4.06152700 | 0.00000000 |
| H | -0.82024000 | -5.46223800 | 0.00000000 |
| H | -3.86805200 | -2.40693100 | 0.00000000 |
| H | -3.23361900 | -4.82834300 | 0.00000000 |

E(UB3LYP/6-31G(d)): -805.895187

E(UB3LYP/6-31G(d) + ZPE): -805.655126

E(UB3LYP/cc-pVTZ//UB3LYP/6-31G(d)): -806.160459

E(UB3LYP/cc-pVTZ//UB3LYP/6-31G(d)): -806.165076 (pcm in benzene)

E(UB3LYP/cc-pVTZ//UB3LYP/6-31G(d)): -806.172334 (pcm in acetonitrile)

E(UB3LYP/cc-pVTZ//UB3LYP/6-31G(d)): -806.172843 (pcm in water)

No vibrational mode with imaginary frequency.

Optimized geometry (UB3PW91/6-31G\*) of radical **5a**.

|   |             |             |            |
|---|-------------|-------------|------------|
| C | 3.13367500  | 2.40210600  | 0.00000000 |
| C | 2.28240100  | 1.27732700  | 0.00000000 |
| C | 2.76894600  | -0.05835800 | 0.00000000 |
| C | 2.60655200  | 3.69220800  | 0.00000000 |
| C | 0.87030200  | 1.48397400  | 0.00000000 |
| C | 0.33611900  | 2.80769900  | 0.00000000 |
| C | 1.23380000  | 3.90209500  | 0.00000000 |
| C | -1.07226800 | 2.97143400  | 0.00000000 |
| H | -1.48619000 | 3.97645700  | 0.00000000 |
| C | -1.92112400 | 1.87847900  | 0.00000000 |
| C | -1.38931900 | 0.58904600  | 0.00000000 |
| C | 0.00000000  | 0.35733900  | 0.00000000 |
| C | 0.51693900  | -0.97016500 | 0.00000000 |
| C | 1.91050900  | -1.14153800 | 0.00000000 |
| H | 2.33193600  | -2.14223900 | 0.00000000 |
| H | 3.27996800  | 4.54578200  | 0.00000000 |
| H | 0.83286000  | 4.91279500  | 0.00000000 |
| H | -3.00019700 | 1.99808800  | 0.00000000 |
| H | 3.84390700  | -0.22158100 | 0.00000000 |
| H | 4.21029900  | 2.25018600  | 0.00000000 |
| O | -2.27958600 | -0.44702300 | 0.00000000 |
| C | -0.45356300 | -2.05682100 | 0.00000000 |
| C | -0.11892000 | -3.42269700 | 0.00000000 |
| C | -1.82614700 | -1.73858300 | 0.00000000 |
| C | -1.09310700 | -4.41161800 | 0.00000000 |
| H | 0.92723000  | -3.71294300 | 0.00000000 |
| C | -2.81235400 | -2.72155000 | 0.00000000 |
| C | -2.44543800 | -4.06185400 | 0.00000000 |
| H | -0.79911600 | -5.45751000 | 0.00000000 |
| H | -3.85324700 | -2.41306900 | 0.00000000 |
| H | -3.21277700 | -4.83092300 | 0.00000000 |

E(UB3PW91/6-31G(d)): -805.590121  
E(UB3PW91/6-31G(d) + ZPE): -805.349343  
E(UB3PW91/cc-pVTZ//UB3PW91/6-31G(d)): -805.840107  
No vibrational mode with imaginary frequency.

Optimized geometry (UM05-2X/6-31G\*) of radical **5a**.

|   |             |             |            |
|---|-------------|-------------|------------|
| C | 3.13710200  | 2.38255800  | 0.00000000 |
| C | 2.28076800  | 1.26551400  | 0.00000000 |
| C | 2.76334300  | -0.07051100 | 0.00000000 |
| C | 2.61715300  | 3.67366400  | 0.00000000 |
| C | 0.87385600  | 1.47860300  | 0.00000000 |
| C | 0.34787500  | 2.80024800  | 0.00000000 |
| C | 1.24759200  | 3.88946800  | 0.00000000 |
| C | -1.05836400 | 2.97237400  | 0.00000000 |
| H | -1.46327600 | 3.97626900  | 0.00000000 |
| C | -1.91052900 | 1.88567700  | 0.00000000 |
| C | -1.38544700 | 0.59538200  | 0.00000000 |
| C | 0.00000000  | 0.35767900  | 0.00000000 |
| C | 0.51176300  | -0.96696900 | 0.00000000 |
| C | 1.90132500  | -1.14762900 | 0.00000000 |
| H | 2.31525400  | -2.14656100 | 0.00000000 |
| H | 3.29163800  | 4.52049600  | 0.00000000 |
| H | 0.85084100  | 4.89699100  | 0.00000000 |
| H | -2.98519600 | 2.00635200  | 0.00000000 |
| H | 3.83340400  | -0.23530000 | 0.00000000 |
| H | 4.20812100  | 2.22356300  | 0.00000000 |
| O | -2.28044400 | -0.43625700 | 0.00000000 |
| C | -0.46402900 | -2.05114600 | 0.00000000 |
| C | -0.12999000 | -3.41363100 | 0.00000000 |
| C | -1.83017500 | -1.73005000 | 0.00000000 |
| C | -1.10396400 | -4.39934100 | 0.00000000 |
| H | 0.91192900  | -3.70325100 | 0.00000000 |
| C | -2.81707300 | -2.70842300 | 0.00000000 |
| C | -2.45365700 | -4.04687400 | 0.00000000 |
| H | -0.81292700 | -5.44149600 | 0.00000000 |
| H | -3.85226600 | -2.39501500 | 0.00000000 |
| H | -3.21926300 | -4.81154600 | 0.00000000 |

E(UM05-2X/6-31G(d)): -805.830012  
E(UM05-2X/6-31G(d) + ZPE): -805.585705  
No vibrational mode with imaginary frequency.

Optimized geometry (B3LYP/6-31G\*) of cation **6a**.

|   |             |             |            |
|---|-------------|-------------|------------|
| C | 2.57882200  | 3.70928600  | 0.00000000 |
| C | 3.11196900  | 2.42211500  | 0.00000000 |
| C | 2.26724200  | 1.29287700  | 0.00000000 |
| C | 0.85898600  | 1.48669600  | 0.00000000 |
| C | 0.31459800  | 2.80139100  | 0.00000000 |
| C | 1.19613500  | 3.89980000  | 0.00000000 |
| C | 2.76540500  | -0.04306100 | 0.00000000 |
| C | 0.00000000  | 0.35549400  | 0.00000000 |
| C | 0.51862800  | -0.97001900 | 0.00000000 |
| C | 1.92749400  | -1.13534300 | 0.00000000 |
| C | -0.42938600 | -2.05900900 | 0.00000000 |
| C | -1.81034900 | -1.74920500 | 0.00000000 |
| C | -1.39684800 | 0.57501600  | 0.00000000 |
| C | -1.95063900 | 1.87283500  | 0.00000000 |

|   |             |             |            |
|---|-------------|-------------|------------|
| C | -1.10583000 | 2.95711300  | 0.00000000 |
| H | -1.52251300 | 3.96039300  | 0.00000000 |
| H | -3.02929300 | 1.98281500  | 0.00000000 |
| H | 3.84128100  | -0.19662200 | 0.00000000 |
| H | 3.24132700  | 4.56856900  | 0.00000000 |
| H | 4.18918000  | 2.28016400  | 0.00000000 |
| H | 0.78868800  | 4.90711900  | 0.00000000 |
| H | 2.35682900  | -2.12995300 | 0.00000000 |
| C | -0.07859500 | -3.43026500 | 0.00000000 |
| C | -1.05244300 | -4.41050100 | 0.00000000 |
| H | 0.96634200  | -3.71882300 | 0.00000000 |
| H | -0.76438700 | -5.45656800 | 0.00000000 |
| C | -2.41708400 | -4.06167300 | 0.00000000 |
| C | -2.80232300 | -2.73112900 | 0.00000000 |
| H | -3.17434000 | -4.83919200 | 0.00000000 |
| H | -3.84434500 | -2.43071600 | 0.00000000 |
| O | -2.25293300 | -0.45271100 | 0.00000000 |

E(B3LYP/6-31G(d)): -805.698162

E(B3LYP/6-31G(d) + ZPE): -805.454981

E(B3LYP/cc-pVTZ//B3LYP/6-31G(d)): -805.955253

E(B3LYP/cc-pVTZ//B3LYP/6-31G(d)): -805.993364 (pcm in benzene)

E(B3LYP/cc-pVTZ//B3LYP/6-31G(d)): -806.025083 (pcm in acetonitrile)

E(B3LYP/cc-pVTZ//B3LYP/6-31G(d)): -806.026615 (pcm in water)

No vibrational mode with imaginary frequency.

Optimized geometry (UB3LYP/6-31G\*) of 1,1,2,2-tetracyanoethyl radical.

|   |             |             |             |
|---|-------------|-------------|-------------|
| C | -0.76613600 | 0.02971200  | 0.01741400  |
| C | 0.58147600  | -0.46231700 | -0.53805200 |
| H | 0.37018500  | -1.15625000 | -1.36181400 |
| C | 1.37160700  | 0.65912800  | -1.08198800 |
| N | 1.97450600  | 1.54353700  | -1.52703300 |
| C | 1.33854900  | -1.20002200 | 0.49210300  |
| N | 1.91405300  | -1.79833400 | 1.30119500  |
| C | -1.95119900 | -0.46106200 | -0.54058000 |
| N | -2.92314800 | -0.89276000 | -1.03275800 |
| C | -0.80502800 | 0.95328500  | 1.07066200  |
| N | -0.82052400 | 1.72525700  | 1.95066100  |

E(UB3LYP/6-31G(d)): -448.095750

E(UB3LYP/6-31G(d) + ZPE): -448.038799

E(UB3LYP/cc-pVTZ//UB3LYP/6-31G(d)): -448.251580

E(UB3LYP/cc-pVTZ//UB3LYP/6-31G(d)): -448.260185 (pcm in benzene)

E(UB3LYP/cc-pVTZ//UB3LYP/6-31G(d)): -448.272836 (pcm in acetonitrile)

E(UB3LYP/cc-pVTZ//UB3LYP/6-31G(d)): -448.274246 (pcm in water)

No vibrational mode with imaginary frequency.

Optimized geometry (B3LYP/6-31G\*) of 1,1,2,2-tetracyanoethyl anion.

|   |             |             |             |
|---|-------------|-------------|-------------|
| C | 0.79260500  | 0.04916400  | -0.00685800 |
| C | -0.56253300 | -0.56743400 | 0.29336000  |
| H | -0.37104700 | -1.52320200 | 0.79943400  |
| C | -1.40012400 | 0.23067200  | 1.22770100  |
| N | -2.02713000 | 0.85229100  | 1.98250900  |
| C | -1.36385600 | -0.89709800 | -0.91606500 |
| N | -1.95866900 | -1.17873400 | -1.87333700 |
| C | 1.93313500  | -0.67986400 | 0.35289700  |

|   |            |             |             |
|---|------------|-------------|-------------|
| N | 2.86755900 | -1.31954600 | 0.66956900  |
| C | 0.87835500 | 1.29980900  | -0.63598000 |
| N | 0.93331900 | 2.34766200  | -1.16299400 |

E(B3LYP/6-31G(d)): -448.224120  
 E(B3LYP/6-31G(d) + ZPE): -448.166645  
 E(B3LYP/cc-pVTZ//B3LYP/6-31G(d)): -448.392371  
 E(B3LYP/cc-pVTZ//B3LYP/6-31G(d)): -448.436083 (pcm in benzene)  
 E(B3LYP/cc-pVTZ//B3LYP/6-31G(d)): -448.472759 (pcm in acetonitrile)  
 E(B3LYP/cc-pVTZ//B3LYP/6-31G(d)): -448.474318 (pcm in water)  
 No vibrational mode with imaginary frequency.

Optimized geometry (B3LYP/6-31G\*) of tetracyanoethene.

|   |            |             |             |
|---|------------|-------------|-------------|
| C | 0.00000000 | 0.00000000  | 0.68622500  |
| C | 0.00000000 | 0.00000000  | -0.68622500 |
| C | 0.00000000 | 1.21902000  | -1.43314400 |
| N | 0.00000000 | 2.19978700  | -2.05779700 |
| C | 0.00000000 | 1.21902000  | 1.43314400  |
| N | 0.00000000 | 2.19978700  | 2.05779700  |
| C | 0.00000000 | -1.21902000 | 1.43314400  |
| N | 0.00000000 | -2.19978700 | 2.05779700  |
| C | 0.00000000 | -1.21902000 | -1.43314400 |
| N | 0.00000000 | -2.19978700 | -2.05779700 |

E(B3LYP/6-31G(d)): -447.518338  
 E(B3LYP/6-31G(d) + ZPE): -447.471683  
 E(B3LYP/cc-pVTZ//B3LYP/6-31G(d)): -447.672934  
 E(B3LYP/cc-pVTZ//B3LYP/6-31G(d)): -447.679299 (pcm in benzene)  
 E(B3LYP/cc-pVTZ//B3LYP/6-31G(d)): -447.689081 (pcm in acetonitrile)  
 E(B3LYP/cc-pVTZ//B3LYP/6-31G(d)): -447.689507 (pcm in water)  
 No vibrational mode with imaginary frequency.

Optimized geometry (B3LYP/6-31G\*) of 9-(4-methoxyphenyl)-phenalenone **1b**.

|   |             |             |             |
|---|-------------|-------------|-------------|
| C | 0.41184800  | -2.00332800 | 0.07854700  |
| C | 1.71767800  | -2.42860400 | 0.11040900  |
| C | 2.77996300  | -1.49418200 | 0.08427200  |
| C | 2.46168600  | -0.10500800 | -0.00577700 |
| C | 1.09593000  | 0.32976400  | -0.05388000 |
| C | 0.06401800  | -0.62606900 | 0.01649300  |
| H | 4.35162200  | -2.97500600 | 0.20895100  |
| H | -0.39349400 | -2.72930000 | 0.13432600  |
| H | 1.94761100  | -3.48971200 | 0.17265200  |
| C | 4.13638400  | -1.91152800 | 0.13993000  |
| C | 3.54454200  | 0.83261900  | -0.05192600 |
| C | 4.85775800  | 0.38196900  | 0.00917100  |
| C | 5.15992900  | -0.98992600 | 0.10620700  |
| H | 5.66543800  | 1.10948200  | -0.02269800 |
| H | 6.19555500  | -1.31404600 | 0.15037100  |
| C | 3.24886400  | 2.24479500  | -0.17081500 |
| C | 1.98162800  | 2.69423400  | -0.26984500 |
| H | 4.08753000  | 2.93835200  | -0.19231300 |
| H | 1.74761400  | 3.74854800  | -0.38051900 |
| C | 0.81944200  | 1.79121300  | -0.25603900 |
| O | -0.30940600 | 2.25227600  | -0.42459600 |
| C | -1.39547100 | -0.33101700 | 0.06693500  |
| C | -2.26502000 | -0.95612000 | -0.83237900 |

|   |             |             |             |
|---|-------------|-------------|-------------|
| C | -1.96052300 | 0.46799300  | 1.07848200  |
| C | -3.65024600 | -0.77893700 | -0.76149700 |
| H | -1.85721500 | -1.57824900 | -1.62506000 |
| C | -3.33076500 | 0.63463500  | 1.17738100  |
| H | -1.31244400 | 0.95947000  | 1.79662700  |
| C | -4.18917000 | 0.01847400  | 0.25139800  |
| H | -4.28579000 | -1.26523000 | -1.49272900 |
| H | -3.76731700 | 1.24575600  | 1.96109500  |
| O | -5.52108200 | 0.25679400  | 0.43031000  |
| C | -6.43378400 | -0.32464100 | -0.48603700 |
| H | -7.42608000 | 0.00201600  | -0.16936000 |
| H | -6.24893200 | 0.01912000  | -1.51240000 |
| H | -6.38833400 | -1.42177600 | -0.46083100 |

E(B3LYP/6-31G(d)): -921.010436

E(B3LYP/6-31G(d) + ZPE): -920.726696

E(B3LYP/cc-pVTZ//B3LYP/6-31G(d)): -921.323328

No vibrational mode with imaginary frequency.

Optimized geometry (UB3LYP/6-31G\*) of the first excited triplet state of 9-(4-methoxyphenyl)-phenalenone, **<sup>3</sup>1b\***.

|   |             |             |             |
|---|-------------|-------------|-------------|
| C | 0.57411100  | -2.13579400 | -0.05185400 |
| C | 1.91975000  | -2.42596000 | 0.09390100  |
| C | 2.88781000  | -1.38857300 | 0.17004600  |
| C | 2.44226000  | -0.02807200 | 0.02892700  |
| C | 1.06482400  | 0.25639500  | -0.16834700 |
| C | 0.09501700  | -0.81715200 | -0.13218900 |
| H | 4.58793300  | -2.68237900 | 0.44905300  |
| H | -0.14630900 | -2.94874700 | -0.03444300 |
| H | 2.24720300  | -3.45768700 | 0.19113000  |
| C | 4.25710800  | -1.65155800 | 0.35496100  |
| C | 3.41846100  | 1.03295900  | 0.05901100  |
| C | 4.79432000  | 0.70763900  | 0.26642200  |
| C | 5.19529000  | -0.60333600 | 0.41039500  |
| H | 5.51977700  | 1.51595700  | 0.29849400  |
| H | 6.24625300  | -0.83550000 | 0.56136300  |
| C | 2.99186200  | 2.36678100  | -0.11432800 |
| C | 1.65986700  | 2.65845900  | -0.34184600 |
| H | 3.72756400  | 3.16586400  | -0.06790100 |
| H | 1.32342000  | 3.67463700  | -0.52154300 |
| C | 0.67356400  | 1.63157400  | -0.44501300 |
| O | -0.51091200 | 1.93959200  | -0.83496100 |
| C | -1.35727600 | -0.59059900 | -0.12091500 |
| C | -2.21902500 | -1.41266100 | -0.88267800 |
| C | -1.95977500 | 0.37675900  | 0.71573000  |
| C | -3.59231700 | -1.25829300 | -0.83571400 |
| H | -1.79033800 | -2.15521200 | -1.54920400 |
| C | -3.34143300 | 0.53142400  | 0.78365300  |
| H | -1.33604700 | 0.98627400  | 1.35892900  |
| C | -4.16849400 | -0.27997100 | -0.00133300 |
| H | -4.25099900 | -1.87145300 | -1.44275200 |
| H | -3.75837500 | 1.27994000  | 1.44721900  |
| O | -5.52560100 | -0.21326300 | -0.02861800 |
| C | -6.17082900 | 0.77283200  | 0.76586400  |
| H | -7.23859900 | 0.66003500  | 0.57126500  |
| H | -5.97745100 | 0.61614700  | 1.83487400  |
| H | -5.85250700 | 1.78438200  | 0.48399300  |

E(UB3LYP/6-31G(d)): -920.947323

E(UB3LYP/6-31G(d) + ZPE): -920.666671  
E(UB3LYP/cc-pVTZ//UB3LYP/6-31G(d)): -921.258994  
No vibrational mode with imaginary frequency.

Optimized geometry (UB3LYP/6-31G\*) for the transition state connecting <sup>3</sup>1b\* and <sup>3</sup>3b\*.

|   |             |             |             |
|---|-------------|-------------|-------------|
| C | -4.27888100 | -1.71665500 | -0.09554000 |
| C | -2.88908100 | -1.43864300 | -0.04291200 |
| C | -1.85597900 | -2.42166500 | -0.00179900 |
| C | -5.20370300 | -0.67036400 | -0.13182500 |
| C | -2.50155700 | -0.06550100 | -0.02964500 |
| C | -3.43683600 | 1.01249500  | -0.06563600 |
| C | -4.81019900 | 0.67064700  | -0.11790800 |
| C | -2.91568600 | 2.34059800  | -0.04525300 |
| H | -3.61869600 | 3.16987200  | -0.07212300 |
| C | -1.54608000 | 2.62270200  | 0.00823700  |
| C | -0.63287800 | 1.55700800  | 0.04334200  |
| C | -1.13535800 | 0.23661500  | 0.02259900  |
| C | -0.12724200 | -0.73267600 | 0.06210600  |
| C | -0.49960300 | -2.08025900 | 0.04996900  |
| H | 0.25179600  | -2.86538600 | 0.08034800  |
| H | -6.26425200 | -0.90680100 | -0.17199600 |
| H | -5.55990500 | 1.45755900  | -0.14672400 |
| H | -1.19170200 | 3.64842300  | 0.02331700  |
| H | -2.13791000 | -3.47161600 | -0.01096400 |
| H | -4.62103000 | -2.74842900 | -0.10713000 |
| O | 0.69740700  | 1.62000800  | 0.09762000  |
| C | 1.24143800  | -0.10307200 | 0.11509500  |
| C | 1.97866300  | -0.18832400 | 1.37572200  |
| C | 2.06508900  | -0.17927800 | -1.08752400 |
| C | 3.34346100  | -0.16073400 | 1.41261100  |
| H | 1.40146400  | -0.23716700 | 2.29334300  |
| C | 3.43929900  | -0.14572000 | -1.03854900 |
| H | 1.55332900  | -0.22276800 | -2.04350700 |
| C | 4.09922000  | -0.11893300 | 0.21042000  |
| H | 3.88553300  | -0.18751100 | 2.35296700  |
| H | 4.00691700  | -0.16302900 | -1.96228200 |
| O | 5.44095800  | -0.08438800 | 0.37295300  |
| C | 6.27676200  | -0.03417600 | -0.77986500 |
| H | 6.06700900  | 0.85707700  | -1.38293500 |
| H | 7.29866600  | 0.01300900  | -0.40157300 |
| H | 6.15676400  | -0.93257900 | -1.39720000 |

E(UB3LYP/6-31G(d)): -920.933822  
E(UB3LYP/6-31G(d) + ZPE): -920.653484  
E(UB3LYP/cc-pVTZ//UB3LYP/6-31G(d)): -921.245723  
One vibrational mode with imaginary frequency.

Optimized geometry (UB3LYP/6-31G\*) for the transition state connecting <sup>3</sup>1b\* and <sup>3</sup>4b\*.

|   |            |             |             |
|---|------------|-------------|-------------|
| C | 4.35742900 | -1.56784900 | 0.06613700  |
| C | 2.95529700 | -1.37436600 | 0.08074900  |
| C | 2.03813800 | -2.45717600 | 0.16323900  |
| C | 5.22477300 | -0.48361500 | -0.03733800 |
| C | 2.43745600 | -0.04032200 | -0.00447600 |
| C | 3.33980100 | 1.06479600  | -0.13047800 |

|   |             |             |             |
|---|-------------|-------------|-------------|
| C | 4.73109900  | 0.81563800  | -0.13781600 |
| C | 2.79419800  | 2.37321100  | -0.24774800 |
| H | 3.47425200  | 3.21672600  | -0.33905400 |
| C | 1.43005200  | 2.59025300  | -0.24161600 |
| C | 0.52085600  | 1.51313900  | -0.14286400 |
| C | 1.02832500  | 0.17586200  | 0.00980700  |
| C | 0.13947900  | -0.93775500 | 0.11893700  |
| C | 0.67126300  | -2.23715300 | 0.17447900  |
| H | -0.00824300 | -3.08022900 | 0.27080600  |
| H | 6.29844800  | -0.65271100 | -0.04636700 |
| H | 5.41549700  | 1.65555500  | -0.22768600 |
| H | 1.01902100  | 3.59051700  | -0.33519400 |
| H | 2.42704600  | -3.47010000 | 0.22826600  |
| H | 4.74891000  | -2.57974800 | 0.13264100  |
| O | -0.77923400 | 1.77024200  | -0.21374900 |
| C | -1.29722700 | -0.67171200 | 0.16770400  |
| C | -2.25298000 | -1.43105600 | -0.50035800 |
| C | -1.72837700 | 0.53357500  | 0.85228500  |
| C | -3.60024800 | -1.05597200 | -0.51680500 |
| H | -1.94290000 | -2.30780600 | -1.06150700 |
| C | -3.10766900 | 0.87964900  | 0.85838400  |
| H | -1.14683900 | 0.84675900  | 1.71439200  |
| C | -4.02569200 | 0.11876500  | 0.15506200  |
| H | -4.31052700 | -1.66297600 | -1.06589300 |
| H | -3.45133100 | 1.74322100  | 1.41731600  |
| O | -5.31966100 | 0.54153800  | 0.19237400  |
| C | -6.31570300 | -0.23188400 | -0.46142600 |
| H | -7.25843300 | 0.28738400  | -0.28137700 |
| H | -6.13771100 | -0.29015900 | -1.54296700 |
| H | -6.37765300 | -1.24683700 | -0.04751900 |

E(UB3LYP/6-31G(d)): -920.937013

E(UB3LYP/6-31G(d) + ZPE): -920.656072

E(UB3LYP/cc-pVTZ//UB3LYP/6-31G(d)): -921.248153

One vibrational mode with imaginary frequency.

Optimized geometry (UB3LYP/6-31G\*) for triplet biradical **<sup>3</sup>3b\***.

|   |             |             |             |
|---|-------------|-------------|-------------|
| C | 0.35156100  | -1.98582800 | 0.07766500  |
| C | 1.68641500  | -2.41572500 | 0.03454200  |
| C | 2.78928600  | -1.50845300 | -0.01869700 |
| C | 2.49672400  | -0.11406600 | -0.02801600 |
| C | 1.15617700  | 0.26674800  | 0.01587000  |
| C | 0.07933400  | -0.61609400 | 0.06811900  |
| H | 4.44534400  | -2.91787100 | -0.05828600 |
| H | -0.44888200 | -2.72004900 | 0.11825400  |
| H | 1.89577300  | -3.48258100 | 0.04231900  |
| C | 4.16063200  | -1.86882100 | -0.06313700 |
| C | 3.48475400  | 0.91343800  | -0.07817200 |
| C | 4.83605900  | 0.48805700  | -0.12095500 |
| C | 5.14425000  | -0.87624400 | -0.11267200 |
| H | 5.63463700  | 1.22468100  | -0.15988000 |
| H | 6.18876500  | -1.17640100 | -0.14594600 |
| C | 3.03069100  | 2.26732500  | -0.08038800 |
| C | 1.67173100  | 2.62502300  | -0.03549200 |
| H | 3.77440400  | 3.05943500  | -0.11819500 |
| H | 1.37383400  | 3.66847200  | -0.03841400 |
| C | 0.72518900  | 1.60120000  | 0.01360700  |
| O | -0.62800100 | 1.67532600  | 0.06373900  |
| C | -1.20067300 | 0.21861600  | 0.10541400  |



|   |             |             |             |
|---|-------------|-------------|-------------|
| C | -1.96740400 | 0.10566200  | 1.38308100  |
| C | -2.06170300 | 0.07048200  | -1.10485400 |
| C | -3.32006500 | -0.03262000 | 1.41387400  |
| H | -1.39220200 | 0.15873300  | 2.30215900  |
| C | -3.42474100 | -0.06369200 | -1.03869500 |
| H | -1.55745500 | 0.09743700  | -2.06572500 |
| C | -4.08193300 | -0.11106400 | 0.21303300  |
| H | -3.85578600 | -0.09548200 | 2.35673600  |
| H | -3.99194000 | -0.14472100 | -1.95997200 |
| O | -5.42192000 | -0.24368700 | 0.38486300  |
| C | -6.25648500 | -0.31641400 | -0.76437900 |
| H | -6.02024900 | -1.19669500 | -1.37527800 |
| H | -7.27634000 | -0.40135600 | -0.38612700 |
| H | -6.16932400 | 0.58810500  | -1.37894300 |

E(UB3LYP/6-31G(d)): -920.935589

E(UB3LYP/6-31G(d) + ZPE): -920.654567

E(UB3LYP/cc-pVTZ//UB3LYP/6-31G(d)): -921.246949

No vibrational mode with imaginary frequency.

Optimized geometry (UB3LYP/6-31G\*) for the first triplet excited state of **4b**, <sup>3</sup>**4b**\*

|   |             |             |             |
|---|-------------|-------------|-------------|
| C | 4.38748500  | -1.54164400 | 0.01729000  |
| C | 2.97918300  | -1.36989500 | 0.05177900  |
| C | 2.07706400  | -2.46200500 | 0.13067900  |
| C | 5.23465400  | -0.44278100 | -0.07817000 |
| C | 2.44390200  | -0.04385500 | -0.00245900 |
| C | 3.32314200  | 1.07977600  | -0.11719500 |
| C | 4.71974500  | 0.85183900  | -0.14884600 |
| C | 2.75396300  | 2.37873100  | -0.20499500 |
| H | 3.41490800  | 3.23654000  | -0.29764400 |
| C | 1.37996300  | 2.56887200  | -0.16963500 |
| C | 0.51871500  | 1.47479400  | -0.05208900 |
| C | 1.03153500  | 0.14756600  | 0.03713700  |
| C | 0.15219000  | -0.97383700 | 0.10401200  |
| C | 0.70352400  | -2.26271200 | 0.15127000  |
| H | 0.04204100  | -3.12108300 | 0.23098500  |
| H | 6.31065400  | -0.59396100 | -0.10407900 |
| H | 5.39043300  | 1.70328400  | -0.23220200 |
| H | 0.94673000  | 3.56223400  | -0.23212100 |
| H | 2.47846700  | -3.47101800 | 0.18014500  |
| H | 4.79530500  | -2.54820200 | 0.06212600  |
| O | -0.82080000 | 1.71450300  | -0.04850600 |
| C | -1.28247500 | -0.68884700 | 0.11650600  |
| C | -2.27740500 | -1.54232100 | -0.27652700 |
| C | -1.63462700 | 0.68726800  | 0.61512200  |
| C | -3.64859700 | -1.16536800 | -0.28219000 |
| H | -2.02257700 | -2.53747600 | -0.63205400 |
| C | -3.06735900 | 1.05860800  | 0.48854100  |
| H | -1.33677700 | 0.75327400  | 1.68039600  |
| C | -4.02096400 | 0.14709800  | 0.08638100  |
| H | -4.38927900 | -1.88499200 | -0.60768300 |
| H | -3.36299500 | 2.06513400  | 0.76424200  |
| O | -5.31126800 | 0.60127600  | 0.06757700  |
| C | -6.33357800 | -0.27379700 | -0.38045800 |
| H | -7.26041300 | 0.30041800  | -0.32701100 |
| H | -6.16804000 | -0.59565800 | -1.41721700 |
| H | -6.42227100 | -1.15966100 | 0.26261700  |

E(UB3LYP/6-31G(d)): -920.949204  
E(UB3LYP/6-31G(d) + ZPE): -920.667357  
E(UB3LYP/cc-pVTZ//UB3LYP/6-31G(d)): -921.259381  
No vibrational mode with imaginary frequency.

Optimized geometry (B3LYP/6-31G\*) for **4b**.

|   |             |             |             |
|---|-------------|-------------|-------------|
| C | -4.32886100 | 1.57275700  | 0.00295600  |
| C | -2.94894900 | 1.37747900  | 0.01858200  |
| C | -2.00613000 | 2.47369300  | -0.01715500 |
| C | -5.21431300 | 0.47991600  | -0.02607500 |
| C | -2.43258800 | 0.04507300  | 0.02362800  |
| C | -3.33021100 | -1.06102100 | -0.06171700 |
| C | -4.72666100 | -0.81270400 | -0.06899000 |
| C | -2.78245900 | -2.36817300 | -0.17919400 |
| H | -3.45853400 | -3.21632000 | -0.25395800 |
| C | -1.42125700 | -2.57189500 | -0.20502300 |
| C | -0.53938700 | -1.47952200 | -0.05168800 |
| C | -1.02575900 | -0.17038600 | 0.06686700  |
| C | -0.09442500 | 0.94928400  | 0.06661200  |
| C | -0.66270200 | 2.27310300  | -0.03066100 |
| H | 0.00248300  | 3.13029700  | -0.05589400 |
| H | -6.28602600 | 0.65763600  | -0.03438900 |
| H | -5.40995300 | -1.65696800 | -0.12102600 |
| H | -0.99556000 | -3.56473000 | -0.30950100 |
| H | -2.40353300 | 3.48576600  | -0.04324900 |
| H | -4.72172200 | 2.58677500  | 0.00075600  |
| O | 0.78994500  | -1.74217400 | -0.08890700 |
| C | 1.25791200  | 0.66617400  | 0.16721100  |
| C | 2.32211900  | 1.59815000  | -0.02485000 |
| C | 1.61816300  | -0.75114000 | 0.58579100  |
| C | 3.63017700  | 1.21214200  | -0.03786500 |
| H | 2.08349400  | 2.63863800  | -0.22522600 |
| C | 3.04204000  | -1.12799500 | 0.33942800  |
| H | 1.36767200  | -0.86375300 | 1.66220100  |
| C | 3.98758800  | -0.19053700 | 0.10803300  |
| H | 4.40276300  | 1.95039900  | -0.21562300 |
| H | 3.31486700  | -2.17313500 | 0.43744600  |
| O | 5.28766200  | -0.61664400 | 0.01313900  |
| C | 6.28571600  | 0.28438100  | -0.43762900 |
| H | 7.20198700  | -0.30508400 | -0.51258800 |
| H | 6.04841900  | 0.70270400  | -1.42469400 |
| H | 6.45270900  | 1.10562300  | 0.27232700  |

E(B3LYP/6-31G(d)): -920.973244  
E(B3LYP/6-31G(d) + ZPE): -920.688929  
E(B3LYP/cc-pVTZ//B3LYP/6-31G(d)): -921.284731  
No vibrational mode with imaginary frequency.

Optimized geometry (B3LYP/6-31G\*) for the transition state connecting **4b** and **1b**.

|   |            |             |             |
|---|------------|-------------|-------------|
| C | 4.32597500 | -1.56973100 | 0.06179000  |
| C | 2.93902500 | -1.36651600 | 0.09919800  |
| C | 2.00530400 | -2.45775000 | 0.10022200  |
| C | 5.20833100 | -0.49225400 | -0.05120500 |
| C | 2.42090200 | -0.03661000 | 0.06391800  |
| C | 3.32437800 | 1.04925800  | -0.13572000 |
| C | 4.71028900 | 0.80054300  | -0.17074500 |
| C | 2.77535700 | 2.34715800  | -0.37771700 |

|   |             |             |             |
|---|-------------|-------------|-------------|
| H | 3.45730100  | 3.17478300  | -0.56037500 |
| C | 1.42534100  | 2.55883100  | -0.40298700 |
| C | 0.51034700  | 1.51779700  | -0.03535500 |
| C | 1.01493900  | 0.18882500  | 0.16543600  |
| C | 0.10403700  | -0.92712100 | 0.17744400  |
| C | 0.65843000  | -2.24756000 | 0.07739200  |
| H | -0.01945400 | -3.09547200 | 0.07797000  |
| H | 6.27966700  | -0.66823000 | -0.07899300 |
| H | 5.39081200  | 1.63670600  | -0.31387100 |
| H | 1.00494100  | 3.53918200  | -0.60204400 |
| H | 2.39786900  | -3.47215000 | 0.10480600  |
| H | 4.71081100  | -2.58617100 | 0.09965000  |
| O | -0.74260900 | 1.84616200  | 0.08878800  |
| C | -1.28426900 | -0.67279500 | 0.23430900  |
| C | -2.26381800 | -1.49901400 | -0.37484200 |
| C | -1.69258400 | 0.60326700  | 0.83808300  |
| C | -3.57900100 | -1.11926100 | -0.46835300 |
| H | -1.94836500 | -2.42644700 | -0.84557200 |
| C | -3.08912500 | 0.95690900  | 0.73630700  |
| H | -1.23025000 | 0.80287000  | 1.80874800  |
| C | -3.98256400 | 0.14068100  | 0.09249700  |
| H | -4.29035400 | -1.74875100 | -0.98766500 |
| H | -3.44723900 | 1.86553300  | 1.20792700  |
| O | -5.27638100 | 0.57496800  | 0.05369600  |
| C | -6.27810600 | -0.27006000 | -0.49082300 |
| H | -7.21819900 | 0.27218100  | -0.37095800 |
| H | -6.11209600 | -0.46517900 | -1.55822600 |
| H | -6.34266600 | -1.22547800 | 0.04563700  |

E(B3LYP/6-31G(d)): -920.964534

E(B3LYP/6-31G(d) + ZPE): -920.681583

E(B3LYP/cc-pVTZ//B3LYP/6-31G(d)): -921.276255

One vibrational mode with imaginary frequency.

Optimized geometry (B3LYP/6-31G\*) of 9-(2,6-dimethylphenyl)-phenalenone **1c**.

|   |             |             |             |
|---|-------------|-------------|-------------|
| C | -0.07774000 | -1.99399400 | 0.00314300  |
| C | 1.23611900  | -2.40253000 | 0.00383800  |
| C | 2.28601200  | -1.45291600 | 0.00231500  |
| C | 1.94928800  | -0.06600300 | 0.00024700  |
| C | 0.57812200  | 0.34629600  | -0.00006300 |
| C | -0.43751700 | -0.62043800 | 0.00118200  |
| H | 3.88713300  | -2.90936600 | 0.00443900  |
| H | -0.87586500 | -2.73099500 | 0.00419500  |
| H | 1.48136700  | -3.46203300 | 0.00548500  |
| C | 3.65089300  | -1.84814000 | 0.00276000  |
| C | 3.01126300  | 0.89466300  | -0.00160500 |
| C | 4.33238700  | 0.46444300  | -0.00118400 |
| C | 4.65682500  | -0.90668900 | 0.00105800  |
| H | 5.12865700  | 1.20503500  | -0.00264500 |
| H | 5.69830200  | -1.21468500 | 0.00139800  |
| C | 2.68303100  | 2.30609800  | -0.00406300 |
| C | 1.40497400  | 2.73816100  | -0.00432200 |
| H | 3.50759000  | 3.01664700  | -0.00568900 |
| H | 1.15050000  | 3.79352700  | -0.00604700 |
| C | 0.26211300  | 1.81103300  | -0.00163000 |
| O | -0.88907300 | 2.24758000  | -0.00050300 |
| C | -1.91090700 | -0.32906400 | 0.00036800  |
| C | -2.60389000 | -0.24988100 | -1.22407000 |

|   |             |             |             |
|---|-------------|-------------|-------------|
| C | -2.60437700 | -0.24419900 | 1.22422800  |
| C | -3.99338800 | -0.08987700 | -1.20426900 |
| C | -3.99380000 | -0.08443400 | 1.20315400  |
| C | -4.68929700 | -0.00962500 | -0.00089300 |
| H | -4.53089600 | -0.02624700 | -2.14758300 |
| H | -4.53173900 | -0.01649200 | 2.14592100  |
| H | -5.76940800 | 0.11200000  | -0.00132500 |
| C | -1.86857800 | -0.30009100 | -2.54395700 |
| H | -1.20725300 | 0.56783800  | -2.65698100 |
| H | -1.24226400 | -1.19526600 | -2.63735800 |
| H | -2.57205600 | -0.29364500 | -3.38227600 |
| C | -1.86939500 | -0.28764600 | 2.54448300  |
| H | -1.24067700 | -1.18073100 | 2.64141000  |
| H | -1.21053700 | 0.58261000  | 2.65416500  |
| H | -2.57309900 | -0.27983900 | 3.38260500  |

E(B3LYP/6-31G(d)): -885.121262

E(B3LYP/6-31G(d) + ZPE): -884.815002

E(B3LYP/cc-pVTZ//B3LYP/6-31G(d)): -885.416748

No vibrational mode with imaginary frequency.

Optimized geometry (B3LYP/6-31G\*) of the first triplet excited state of 9-(2,6-dimethylphenyl)-phenalenone **1c**, <sup>3</sup>**1c**\*

|   |             |             |             |
|---|-------------|-------------|-------------|
| C | -0.08834100 | -1.98626500 | 0.00128700  |
| C | 1.24626500  | -2.39827500 | 0.00787900  |
| C | 2.28978100  | -1.45213000 | 0.00849800  |
| C | 1.94774400  | -0.05708500 | -0.00653900 |
| C | 0.58932200  | 0.35005900  | -0.02257100 |
| C | -0.45666500 | -0.64262200 | -0.00894100 |
| H | 3.89650700  | -2.89879200 | 0.03107600  |
| H | -0.87514300 | -2.73603800 | 0.00942500  |
| H | 1.48949700  | -3.45751300 | 0.01804600  |
| C | 3.65276000  | -1.84017800 | 0.02224800  |
| C | 3.01928700  | 0.91925100  | -0.00512700 |
| C | 4.39468000  | 0.46054700  | 0.01176400  |
| C | 4.68940400  | -0.87660600 | 0.02438700  |
| H | 5.18317400  | 1.20760800  | 0.01319400  |
| H | 5.72413900  | -1.20784600 | 0.03622200  |
| C | 2.71818900  | 2.28327400  | -0.01795200 |
| C | 1.39079800  | 2.70818000  | -0.03887800 |
| H | 3.52722800  | 3.00896500  | -0.01250400 |
| H | 1.13266300  | 3.76242500  | -0.05784500 |
| C | 0.29446000  | 1.78855200  | -0.05396200 |
| O | -0.89295700 | 2.23631600  | -0.10768200 |
| C | -1.92734900 | -0.33817700 | 0.00749500  |
| C | -2.64476400 | -0.28111900 | -1.20454400 |
| C | -2.59872500 | -0.21100300 | 1.24061200  |
| C | -4.03106600 | -0.09897200 | -1.16402300 |
| C | -3.98615700 | -0.02981600 | 1.24177200  |
| C | -4.70310900 | 0.02432900  | 0.04950100  |
| H | -4.58520400 | -0.04951500 | -2.09860000 |
| H | -4.50514100 | 0.07152000  | 2.19221100  |
| H | -5.78095400 | 0.16421100  | 0.06564200  |
| C | -1.93576900 | -0.37849600 | -2.53609600 |
| H | -1.22904900 | 0.45040800  | -2.66559600 |
| H | -1.36092800 | -1.30707500 | -2.63297600 |
| H | -2.65162800 | -0.33829200 | -3.36303000 |
| C | -1.84313800 | -0.24538000 | 2.54985600  |
| H | -1.25801700 | -1.16544700 | 2.66492000  |

|   |             |             |            |
|---|-------------|-------------|------------|
| H | -1.13830900 | 0.59211100  | 2.62284500 |
| H | -2.53081000 | -0.17567600 | 3.39843300 |

E(UB3LYP/6-31G(d)): -885.054272  
E(UB3LYP/6-31G(d) + ZPE): -884.751624  
E(UB3LYP/cc-pVTZ//UB3LYP/6-31G(d)): -885.348531  
No vibrational mode with imaginary frequency.

Optimized geometry (UB3LYP/6-31G\*) for the transition state connecting <sup>3</sup>1c\* and <sup>3</sup>3c\*.

|   |             |             |             |
|---|-------------|-------------|-------------|
| C | -3.77221100 | -1.69596400 | 0.00003600  |
| C | -2.38116000 | -1.42054400 | 0.00003600  |
| C | -1.35086000 | -2.40705000 | 0.00007900  |
| C | -4.69593500 | -0.64831600 | -0.00000800 |
| C | -1.98841000 | -0.04886000 | -0.00001200 |
| C | -2.92337400 | 1.02994600  | -0.00005800 |
| C | -4.29847600 | 0.69132600  | -0.00005400 |
| C | -2.40163600 | 2.35791600  | -0.00010400 |
| H | -3.10465200 | 3.18754100  | -0.00013900 |
| C | -1.03169900 | 2.63854400  | -0.00010700 |
| C | -0.11716400 | 1.57210200  | -0.00006100 |
| C | -0.61911300 | 0.25058900  | -0.00001400 |
| C | 0.38711400  | -0.72275900 | 0.00002900  |
| C | 0.00711900  | -2.06949100 | 0.00007500  |
| H | 0.75580900  | -2.85810500 | 0.00010900  |
| H | -5.75768000 | -0.88236800 | -0.00000700 |
| H | -5.04635700 | 1.48042400  | -0.00008800 |
| H | -0.67525700 | 3.66363300  | -0.00014300 |
| H | -1.63591500 | -3.45613100 | 0.00011500  |
| H | -4.11597400 | -2.72721400 | 0.00007100  |
| O | 1.21253500  | 1.64489300  | -0.00005800 |
| C | 1.76664100  | -0.11243900 | 0.00001600  |
| C | 2.52877700  | -0.16659100 | 1.25936800  |
| C | 2.52880000  | -0.16669500 | -1.25931800 |
| C | 3.90713300  | -0.12998600 | 1.21963800  |
| C | 3.90715500  | -0.13009100 | -1.21956700 |
| C | 4.60589600  | -0.10493500 | 0.00004100  |
| H | 4.46408500  | -0.13407600 | 2.15333900  |
| H | 4.46412400  | -0.13426300 | -2.15325800 |
| H | 5.69182600  | -0.07919400 | 0.00004900  |
| C | 1.78409700  | -0.19495500 | -2.56408800 |
| H | 1.13306400  | -1.07372300 | -2.64060900 |
| H | 1.13838400  | 0.68657200  | -2.65994300 |
| H | 2.47824900  | -0.20392100 | -3.40959800 |
| C | 1.78405200  | -0.19474100 | 2.56412500  |
| H | 1.13835600  | 0.68680600  | 2.65990600  |
| H | 1.13299900  | -1.07349100 | 2.64070100  |
| H | 2.47818900  | -0.20366300 | 3.40964800  |

E(UB3LYP/6-31G(d)): -885.045661  
E(UB3LYP/6-31G(d) + ZPE): -884.742668  
E(UB3LYP/cc-pVTZ//UB3LYP/6-31G(d)): -885.339295  
One vibrational mode with imaginary frequency.

Optimized geometry (UB3LYP/6-31G\*) for the transition state connecting <sup>3</sup>1c\* and <sup>3</sup>4c\*.

|   |             |            |            |
|---|-------------|------------|------------|
| C | -3.82032400 | 1.57108000 | 0.35474200 |
|---|-------------|------------|------------|

|   |             |             |             |
|---|-------------|-------------|-------------|
| C | -2.42510600 | 1.33064100  | 0.33648200  |
| C | -1.47477300 | 2.33292300  | 0.66788600  |
| C | -4.72079200 | 0.56554600  | 0.01455400  |
| C | -1.94812400 | 0.03050200  | -0.03229500 |
| C | -2.88494900 | -0.99398300 | -0.38226900 |
| C | -4.26679900 | -0.70025100 | -0.35142700 |
| C | -2.38101000 | -2.27485900 | -0.74235700 |
| H | -3.08673200 | -3.05823700 | -1.00847700 |
| C | -1.02778500 | -2.54558600 | -0.73929800 |
| C | -0.08100800 | -1.54448300 | -0.41561000 |
| C | -0.54566800 | -0.23003200 | -0.05962000 |
| C | 0.38141200  | 0.81064100  | 0.25759000  |
| C | -0.11421000 | 2.07464000  | 0.61741500  |
| H | 0.58640000  | 2.85848000  | 0.88960500  |
| H | -5.78819000 | 0.76979800  | 0.03289300  |
| H | -4.97601700 | -1.48007300 | -0.61773600 |
| H | -0.65066000 | -3.53017300 | -0.99738200 |
| H | -1.82996000 | 3.31663500  | 0.96404000  |
| H | -4.17951600 | 2.55762000  | 0.63668500  |
| O | 1.20297600  | -1.85945300 | -0.44361000 |
| C | 1.81967000  | 0.49560800  | 0.17849600  |
| C | 2.72760000  | 1.24153400  | -0.59400200 |
| C | 2.23993400  | -0.76348700 | 0.78550500  |
| C | 4.03234600  | 0.75358000  | -0.76578900 |
| C | 3.58750800  | -1.20610300 | 0.56034800  |
| C | 4.45512200  | -0.46745200 | -0.20510700 |
| H | 4.72573700  | 1.32208400  | -1.38054000 |
| H | 3.90654300  | -2.13340200 | 1.02750800  |
| H | 5.47265800  | -0.81093200 | -0.37013700 |
| C | 1.61485500  | -1.24147000 | 2.08157100  |
| H | 1.83334600  | -2.30221100 | 2.23403100  |
| H | 2.05119300  | -0.68019600 | 2.91816900  |
| H | 0.53471200  | -1.09683000 | 2.11263800  |
| C | 2.33985000  | 2.52125800  | -1.30365600 |
| H | 1.32503300  | 2.46911000  | -1.70794700 |
| H | 2.37586700  | 3.38967300  | -0.63398800 |
| H | 3.02928100  | 2.72279600  | -2.12943600 |

E(UB3LYP/6-31G(d)): -885.043906

E(UB3LYP/6-31G(d) + ZPE): -884.740024

E(UB3LYP/cc-pVTZ//UB3LYP/6-31G(d)): -885.337485

One vibrational mode with imaginary frequency.

Optimized geometry (UB3LYP/6-31G\*) for triplet biradical **<sup>3</sup>3c\***.

|   |             |             |             |
|---|-------------|-------------|-------------|
| C | -0.11904600 | -2.02514600 | 0.00008100  |
| C | 1.22687500  | -2.42388900 | 0.00009000  |
| C | 2.31041300  | -1.49184200 | 0.00004900  |
| C | 1.98652400  | -0.10474200 | -0.00000400 |
| C | 0.63673300  | 0.24425800  | -0.00001100 |
| C | -0.42148300 | -0.66178300 | 0.00002900  |
| H | 3.99992300  | -2.86176800 | 0.00009300  |
| H | -0.90267100 | -2.77835500 | 0.00011400  |
| H | 1.45978500  | -3.48584200 | 0.00013100  |
| C | 3.69053800  | -1.81977300 | 0.00005400  |
| C | 2.95027400  | 0.94650000  | -0.00005000 |
| C | 4.31213400  | 0.55298600  | -0.00004100 |
| C | 4.65154900  | -0.80390600 | 0.00001000  |
| H | 5.09420200  | 1.30804100  | -0.00007400 |
| H | 5.70328900  | -1.07939600 | 0.00001600  |

|   |             |             |             |
|---|-------------|-------------|-------------|
| C | 2.46402300  | 2.28931100  | -0.00010000 |
| C | 1.09553100  | 2.61459600  | -0.00010700 |
| H | 3.18903500  | 3.09931500  | -0.00013500 |
| H | 0.77309400  | 3.65075600  | -0.00014700 |
| C | 0.17596400  | 1.56680200  | -0.00006200 |
| O | -1.18338000 | 1.60423500  | -0.00005800 |
| C | -1.72082100 | 0.15885800  | 0.00000100  |
| C | -2.51916100 | -0.00628500 | 1.27602300  |
| C | -2.51917200 | -0.00638300 | -1.27600100 |
| C | -3.84351400 | -0.35630400 | 1.22244200  |
| C | -3.84352500 | -0.35639500 | -1.22238100 |
| C | -4.52455100 | -0.54927000 | 0.00004100  |
| H | -4.38796400 | -0.48260500 | 2.15593000  |
| H | -4.38798500 | -0.48276300 | -2.15585500 |
| H | -5.57436500 | -0.82526800 | 0.00005600  |
| C | -1.80968300 | 0.22818200  | 2.57940500  |
| H | -0.95773500 | -0.45201200 | 2.70682200  |
| H | -1.41121600 | 1.24890900  | 2.63245500  |
| H | -2.49032500 | 0.08408200  | 3.42388900  |
| C | -1.80971000 | 0.22800100  | -2.57940700 |
| H | -1.41119900 | 1.24870800  | -2.63250500 |
| H | -0.95779500 | -0.45223400 | -2.70681600 |
| H | -2.49037600 | 0.08389800  | -3.42387100 |

E(UB3LYP/6-31G(d)): -885.049124

E(UB3LYP/6-31G(d) + ZPE): -884.745137

E(UB3LYP/cc-pVTZ//UB3LYP/6-31G(d)): -885.342180

No vibrational mode with imaginary frequency.

Optimized geometry (UB3LYP/6-31G\*) for the first triplet excited state of **4c**, <sup>3</sup>**4c**\*

|   |             |             |             |
|---|-------------|-------------|-------------|
| C | -3.84915000 | 1.61385700  | 0.24962200  |
| C | -2.45089400 | 1.36621400  | 0.24980300  |
| C | -1.49401700 | 2.37116800  | 0.53181400  |
| C | -4.75071000 | 0.59299900  | -0.02979400 |
| C | -1.98269400 | 0.04495600  | -0.03793900 |
| C | -2.91943000 | -0.99945900 | -0.32209200 |
| C | -4.30209200 | -0.69737600 | -0.31404700 |
| C | -2.41916100 | -2.30006600 | -0.59852200 |
| H | -3.12331100 | -3.09763900 | -0.82093600 |
| C | -1.05960400 | -2.57071500 | -0.56681200 |
| C | -0.14238700 | -1.55215000 | -0.28823900 |
| C | -0.58177100 | -0.21967600 | -0.04601300 |
| C | 0.36289700  | 0.83021800  | 0.16995800  |
| C | -0.12945400 | 2.10506100  | 0.48792600  |
| H | 0.56575300  | 2.90126900  | 0.72780300  |
| H | -5.81737400 | 0.80164600  | -0.02743700 |
| H | -5.01498300 | -1.48882800 | -0.53104800 |
| H | -0.67921900 | -3.57087500 | -0.74957900 |
| H | -1.83969500 | 3.37040400  | 0.78429200  |
| H | -4.20498200 | 2.61707400  | 0.46984900  |
| O | 1.17427100  | -1.87909800 | -0.25739400 |
| C | 1.78775000  | 0.47303500  | 0.05167400  |
| C | 2.79153300  | 1.28198900  | -0.44758700 |
| C | 2.07657800  | -0.96065200 | 0.47386500  |
| C | 4.11739600  | 0.76778400  | -0.57585900 |
| C | 3.46063600  | -1.43242200 | 0.15838200  |
| C | 4.42453600  | -0.57936400 | -0.29412500 |
| H | 4.89410700  | 1.42499100  | -0.95621700 |

|   |            |             |             |
|---|------------|-------------|-------------|
| H | 3.66706400 | -2.48079100 | 0.35423500  |
| H | 5.43544000 | -0.94195100 | -0.46366000 |
| C | 1.81236200 | -1.17372400 | 1.98505300  |
| H | 1.99775300 | -2.22079100 | 2.24616200  |
| H | 2.48327400 | -0.54019500 | 2.57346300  |
| H | 0.78036800 | -0.92340200 | 2.24642800  |
| C | 2.56622400 | 2.69856900  | -0.93611200 |
| H | 1.57900700 | 2.82433800  | -1.38882800 |
| H | 2.65191200 | 3.43396400  | -0.12521000 |
| H | 3.31943500 | 2.96209800  | -1.68592800 |

E(UB3LYP/6-31G(d)): -885.057453

E(UB3LYP/6-31G(d) + ZPE): -884.752315

E(UB3LYP/cc-pVTZ//UB3LYP/6-31G(d)): -885.349984

No vibrational mode with imaginary frequency.

Optimized geometry (B3LYP/6-31G\*) for **4c**.

|   |             |             |             |
|---|-------------|-------------|-------------|
| C | -3.81134300 | 1.70066900  | 0.14649700  |
| C | -2.44722100 | 1.41657900  | 0.11765900  |
| C | -1.43663300 | 2.44122500  | 0.19624400  |
| C | -4.76532600 | 0.67499900  | 0.02702100  |
| C | -2.00814000 | 0.06537200  | -0.01854000 |
| C | -2.98037800 | -0.96980400 | -0.17532200 |
| C | -4.35804100 | -0.63496400 | -0.13909500 |
| C | -2.52915500 | -2.29944300 | -0.39397700 |
| H | -3.26278500 | -3.09124600 | -0.52314300 |
| C | -1.18653600 | -2.58927300 | -0.43958000 |
| C | -0.23521300 | -1.56721800 | -0.22710800 |
| C | -0.61274600 | -0.23703500 | -0.02648300 |
| C | 0.40842400  | 0.81439900  | 0.03672900  |
| C | -0.10824000 | 2.16627200  | 0.13026700  |
| H | 0.57859600  | 2.99223300  | 0.21548000  |
| H | -5.82387800 | 0.91809500  | 0.05253100  |
| H | -5.09195400 | -1.42914600 | -0.25331400 |
| H | -0.82372100 | -3.59844900 | -0.60652700 |
| H | -1.76356100 | 3.47236600  | 0.31071400  |
| H | -4.13595400 | 2.73300600  | 0.25389000  |
| O | 1.06287100  | -1.93559200 | -0.26493900 |
| C | 1.75308700  | 0.44397600  | 0.00472600  |
| C | 2.91256200  | 1.28702100  | -0.23298400 |
| C | 2.03424600  | -1.03422400 | 0.34566400  |
| C | 4.14185500  | 0.70790700  | -0.42563900 |
| C | 3.34680600  | -1.55770100 | -0.16367300 |
| C | 4.35042300  | -0.71849600 | -0.46195800 |
| H | 4.98934600  | 1.35128700  | -0.64641100 |
| H | 3.44351300  | -2.63829000 | -0.21058500 |
| H | 5.32238200  | -1.09793900 | -0.76748900 |
| C | 1.96366200  | -1.22163800 | 1.87890000  |
| H | 2.12954600  | -2.27324000 | 2.13857200  |
| H | 2.74067700  | -0.61494300 | 2.35440700  |
| H | 0.99078900  | -0.90439800 | 2.26877200  |
| C | 2.84733100  | 2.79299100  | -0.37989800 |
| H | 2.15148200  | 3.10224900  | -1.16791000 |
| H | 2.54104000  | 3.29141300  | 0.54785800  |
| H | 3.83497100  | 3.18204900  | -0.64404800 |

E(B3LYP/6-31G(d)): -885.081907

E(B3LYP/6-31G(d) + ZPE): -884.773668



E(B3LYP/cc-pVTZ//B3LYP/6-31G(d)): -885.375753  
No vibrational mode with imaginary frequency.

Optimized geometry (B3LYP/6-31G\*) for the transition state connecting  
**4c** and **1c**.

|   |             |             |             |
|---|-------------|-------------|-------------|
| C | -3.81370700 | 1.57675000  | 0.31244500  |
| C | -2.43318000 | 1.32011300  | 0.33088100  |
| C | -1.46685300 | 2.34241200  | 0.59476900  |
| C | -4.72303900 | 0.57669800  | -0.03175300 |
| C | -1.95402400 | 0.00801600  | 0.03740100  |
| C | -2.88940500 | -0.99309000 | -0.36824800 |
| C | -4.26261800 | -0.68859300 | -0.38635100 |
| C | -2.38449500 | -2.25736900 | -0.80889800 |
| H | -3.09197900 | -3.00932100 | -1.15105700 |
| C | -1.04563600 | -2.52772700 | -0.80855800 |
| C | -0.11412000 | -1.60185500 | -0.23264000 |
| C | -0.55746600 | -0.28040700 | 0.11090200  |
| C | 0.39898300  | 0.77844100  | 0.30149500  |
| C | -0.12529600 | 2.09553300  | 0.52695100  |
| H | 0.56946100  | 2.89893300  | 0.73560400  |
| H | -5.78753100 | 0.79193000  | -0.04720400 |
| H | -4.96633900 | -1.45681000 | -0.69829700 |
| H | -0.65430600 | -3.48653000 | -1.13288500 |
| H | -1.82184700 | 3.34048000  | 0.84165100  |
| H | -4.16705200 | 2.57675300  | 0.55257300  |
| O | 1.09149600  | -2.02365300 | -0.02031700 |
| C | 1.79581600  | 0.48680800  | 0.17858900  |
| C | 2.72422800  | 1.30666500  | -0.54671100 |
| C | 2.22222100  | -0.83791000 | 0.67566700  |
| C | 3.97192900  | 0.80140700  | -0.86170900 |
| C | 3.52754400  | -1.31212300 | 0.23971600  |
| C | 4.35668900  | -0.51460400 | -0.48732500 |
| H | 4.65196000  | 1.40088900  | -1.46002800 |
| H | 3.82790400  | -2.30843100 | 0.55141200  |
| H | 5.33745000  | -0.88188100 | -0.78164400 |
| C | 1.90015100  | -1.14878800 | 2.13146000  |
| H | 2.05477900  | -2.21249700 | 2.33834800  |
| H | 2.57856100  | -0.57097700 | 2.77123200  |
| H | 0.87458100  | -0.87637900 | 2.39517900  |
| C | 2.37178500  | 2.67819200  | -1.08485500 |
| H | 1.38494800  | 2.69926600  | -1.55914500 |
| H | 2.37026100  | 3.44664600  | -0.30129000 |
| H | 3.11013900  | 2.98573500  | -1.83127800 |

E(B3LYP/6-31G(d)): -885.069312  
E(B3LYP/6-31G(d) + ZPE): -884.763244  
E(B3LYP/cc-pVTZ//B3LYP/6-31G(d)): -885.363111  
One vibrational mode with imaginary frequency.
